---

## 2 Providing recombinant gonadotropin-based therapies that induce 3 complete gametogenesis and produce viable larvae from an immature 4 teleost, flathead grey mullet (*Mugil cephalus*)

4 Sandra Ramos-Júdez<sup>1</sup>, François Chauvigné<sup>2</sup>, Wendy Ángela González-López<sup>1</sup>, Hanna  
5 Rosenfeld<sup>3</sup>, Joan Cerdà<sup>2</sup>, Ignacio Giménez<sup>4\*</sup>, and Neil Duncan<sup>1\*</sup>

6 <sup>1</sup> IRTA, Sant Carles de la Ràpita Ctra. de Poble Nou km. 5.5, 43540 Sant Carles de la Ràpita, Tarragona, Spain.

8 <sup>2</sup> IRTA-Institute of Biotechnology and Biomedicine (IBB), Universitat Autònoma de Barcelona, Parc de Recerca UAB, Mòdul B, E-  
08193 Bellaterra, Barcelona, Spain

9 <sup>3</sup> Israel Oceanographic Limnological Research, National Center for Mariculture, Eilat, Israel.

10 <sup>4</sup> Rara Avis Biotec, S. L., Valencia, Spain.

---

### Abstract

12 Under intensive captive conditions, wild-caught flathead grey mullet (*Mugil cephalus*)  
13 females remain arrested at early gonad development and males do not produce sperm.  
14 With the aim to induce gametogenesis and obtain fertilized eggs, adult female and male  
15 grey mullet were treated with *M. cephalus* single-chain recombinant gonadotropins  
16 (rGths), follicle-stimulating (rFsh) and luteinizing (rLh) hormones. In Experiment 1, a  
17 weekly dose of rFsh (15 µg kg<sup>-1</sup>) significantly ( $P < 0.001$ ) increased plasma concentration  
18 of 17β-estradiol in females and induced oocyte growth up to a maximum diameter of 425  
19 ± 19 µm after 9 weeks of treatment. In males, spermiogenesis (> 75% motile  
20 spermatozoa) was induced after 5 weeks to produce low quantities (29.3 ± 6.1 µL) of  
21 viscous sperm. However, the application of therapies based on human chorionic  
22 gonadotropin (hCG) or gonadotropin releasing hormone agonist (GnRHa) were  
23 ineffective to complete oocyte maturation. In Experiment 2, fish were treated with weekly  
24 injections of both rFsh and rLh at different doses (from 2.5 to 12 µg kg<sup>-1</sup>). Oocyte  
25 diameter reached 609 ± 5 µm prior to oocyte maturation and ovulation, which was  
26 induced with 30 µg kg<sup>-1</sup> of rLh and 40 mg kg<sup>-1</sup> of progesterone. Higher quantities of good  
27 quality sperm (92.7 ± 24.7 µL) were obtained after rLh treatment of males and used to  
28 fertilise the eggs. Although the percentage of fertilisation was low (0.4 %), these eggs  
29 were able to produce viable larvae (71% hatching rate). In comparison, control groups  
30 remained arrested as immature fish. The study demonstrated that both rGths are effective  
31 to induce the entire process of gametogenesis in sexually immature male and female grey  
32 mullet, which confirmed the central roles of the Gths in teleost gametogenesis. This  
33 advance provides the bases of a therapy for the use in the aquaculture of teleosts of  
34 commercial interest or the conservation of endangered species.

**Keywords:** *Mugil cephalus*, flathead grey mullet, gametogenesis induction, eggs, larvae, rFsh, rLh.

---

36 \* Corresponding authors:

37 Neil Duncan<sup>1</sup>, Email: [neil.duncan@irta.cat](mailto:neil.duncan@irta.cat)

38 Ignacio Giménez<sup>4</sup>, Email: [igimenez@raraavis-bio.com](mailto:igimenez@raraavis-bio.com)

Ramos-Júdez, *et al.*,

## 1. Introduction

40 The flathead grey mullet (*Mugil cephalus*) is a catadromous teleost with a worldwide  
42 distribution (between latitudes 40° North and South) [1] that has been cultured for several  
centuries principally in some Asian countries and along the Mediterranean basin. Many  
44 positive attributes of grey mullet culture have made this species a suitable option for  
aquaculture. Grey mullet has fast growth (0.75 - 1 kg per year) [2], does not require  
46 dietary fish meal and oil and can be reared in a wide range of salinities and culture systems  
including polyculture [3]. In addition, the final product marketed in various forms has  
good texture, taste [4] and is an excellent source of omega-3 essential fatty acids [5].

48 Although this species has a long history of culture, it exhibits different degrees of  
reproductive dysfunctions in both genders under captive conditions. These dysfunctions  
50 have limited the possibility to close the life cycle and, thus, culture has been based on the  
capture of wild juveniles [4] or induced spawning of wild breeders [6 - 10]. Two types of  
52 reproductive dysfunction have been described and can be placed in two categories; arrest  
in the late stages or early stages of gametogenesis. Arrest in late stages of gametogenesis  
54 (maturation and ovulation) has been observed in recently caught wild mullet or wild  
mullet that were acclimated to ponds or large tanks [4, 11, 12]. This is the most commonly  
56 observed dysfunction in fish and can be controlled by hormonally inducing spawning [13,  
14], as has been achieved for flathead grey mullet [4, 6 - 11]. However, the spawning  
58 induction of these wild fish arrested in the late stages of gametogenesis does not represent  
a sustainable solution for mullet culture. The more severe reproductive dysfunction when  
60 development is arrested in the early stages of gametogenesis has been observed in wild  
and hatchery reared fish held in intensive culture conditions in the Mediterranean region.  
62 Females did not initiate vitellogenesis; remained at the primary growth stage or cortical  
alveoli stage (present study), or were arrested at early stages of vitellogenesis [15]. Males  
64 failed to initiate spermiation [16, 17] or produced highly viscous milt that could not  
fertilize the eggs [18]. These reproductive dysfunctions may be related to alterations in  
66 the endocrine control in the brain-pituitary-gonadal (BPG) axis.

In vertebrates, the pituitary gonadotropins (Gths), the follicle-stimulating hormone (Fsh)  
68 and luteinizing hormone (Lh), are generally accepted to be the central components of the  
BPG axis in the control of gonad development. Current knowledge in teleost suggest that  
70 the major role of Fsh is to promote gametogenesis from early stages through to late stages  
(vitellogenesis in females and spermatogenesis in males), while Lh is involved in gamete  
72 maturation and release (ovulation and spermiation, in females and males, respectively)  
[14, 19]. The mechanism underlying the reproductive dysfunctions in Mediterranean  
74 captive mullets has been described as an inhibition by dopamine (DA) on the action of  
gonadotropin releasing hormone (GnRH) to release Gths in both females [15] and males  
76 [20]. Therefore, methods based on the mechanisms controlling gametogenesis are  
required to induce complete gonadal development, from early stages through to the late  
78 stages. In the case of males, 17 $\alpha$ -methyltestosterone (MT) implants enhanced  
spermatogenesis and spermiation [15, 17]. In females, treatment with GnRH agonist  
80 (GnRHa) in combination with a DA antagonist [15] or a single injection of recombinant  
Fsh produced in the yeast *Pichia pastoris* [21] increased the number of vitellogenic  
82 females by promoting the release of Gths from the pituitary. However, hormonal therapies  
to enhance endogenous Lh release have been observed to be less effective when the  
84 pituitary Lh content was low [22], indicating that alternative therapies may be required in  
these situations.

Ramos-Júdez, *et al.*,

86 An alternative strategy to control gametogenesis in mullet as in other teleost, which would  
87 not require the availability of endogenous Gths from the pituitary, is the long-term use of  
88 recombinant Fsh and Lh (rFsh and rLh, respectively). This approach is nowadays possible  
89 through the production of large amounts of species-specific rGths in heterologous  
90 expression systems, such as the *Drosophila* S2 cell line [23, 24], the yeast *Pichia pastoris*  
91 [25 - 30], baculovirus silkworm larvae [31 - 36], HEK293 cells [37] and mammalian  
92 Chinese hamster ovary (CHO) cells [38 - 43]. The application of rGths based therapies  
93 has shown promise to control gametogenesis in different teleost [41 - 45], and therefore  
94 could be an effective method to induce gametogenesis in cultured mullet arrested in the  
early stages of sexual maturation.

96 The present study aimed to use homologous single-chain rGths produced in CHO cells as  
97 the basis of a long-term hormone therapy to obtain viable offspring from flathead grey  
98 mullet that were arrested in early gametogenesis. For this purpose, *M. cephalus* rFsh was  
administered to induce gametogenesis in immature females and males followed by  
100 treatments to induce oocyte maturation, ovulation and spermiation, which were either (a)  
101 therapies previously employed in this species such as human chorionic gonadotropin  
102 (hCG) and GnRH $\alpha$ , or (b) *M. cephalus* rLh.

## 2. Material and methods

### 104 2.1. Study animals and maintenance

Flathead grey mullet were used in two experiments to examine the effect of rGth hormone  
106 therapies. Experiment 1 examined the long-term effect of rFsh on gametogenesis and was  
followed by Experiment 2 that examined the effect of a combined rFsh and rLh therapy.  
108 Experiment 1, used wild-caught mullet from the Ebro River reared in 10-m<sup>3</sup> tanks for 7-  
9 months in IRTA facilities (Sant Carles de la Ràpita, Spain). In Experiment 2, the  
110 broodstock was formed with wild-caught individuals reared for 19-21 months and  
individuals reared for 3 months in IRTA that were obtained from semi-extensive pond  
112 culture in the fish farm Finca Veta La Palma (Isla Mayor, Spain).

One month before each trial, individuals were transferred to two 10-m<sup>3</sup> tanks in a  
114 recirculating system (IRTAmor®) under natural conditions and were gradually  
acclimatized from fresh water to sea water at 36 ‰ to provide the conditions for gonad  
116 development, as Tamaru *et al.* [46] concluded that the rate of oocyte growth was lower  
in females maturing in fresh water. During Experiment 1, completed from August to  
118 November, water temperature in the tanks was controlled at 24 ± 1 °C. Photoperiod was  
ambient until October, when a constant 11L:13D (light:dark) was maintained through to  
120 the end of the experiment to avoid large changes of decreasing day length. Individuals  
were fed five days a week on a soft mixture of 20 % sardines, 20% hake, 15 % mussels,  
122 10 % squid, 10 % shrimp, spirulina and 25 % a commercial broodstock diet (Mar Vitalis  
Repro, Skretting, Spain). In Experiment 2, completed from the end of July to mid-  
124 October, water temperature was also controlled at 24 ± 1 °C while photoperiod was  
ambient. Fish were fed a commercial marine fish broodstock diet (Brood Feed Lean,  
126 Sparos, Portugal) during five days a week at a daily rate of 1.5% of the body weight and  
two days a week with mussels and polychaetes. To evaluate *in vivo* dose-response of rFsh,  
128 fish were treated during May and held for 21 days when temperature was controlled to 24  
± 1 °C, photoperiod was natural and feeding was as described for Experiment 2. Prior to  
130 the experiments, fish had the same feeding regimens and were held in natural conditions  
of photoperiod and temperature.

Ramos-Júdez, *et al.*,

132 The present experimental study has been approved by IRTA's Ethics Committee for  
134 Animal Experimentation and the Animal Experimentation Commission from the Local  
136 Government (*Dpt. de Territori i Sostenibilitat from the Generalitat de Catalunya*). The  
138 study was conducted in accordance with the European Union, Spanish and Catalan  
140 legislation for experimental animal protection (European Directive 2010/63/EU of 22  
142 September on the protection of animals used for scientific purposes; Spanish Royal  
144 Decree 53/2013 of February 1st on the protection of animals used for experimentation or  
146 other scientific purposes; Boletín Oficial del Estado (BOE), 2013; Catalan Law 5/1995  
of June 21th, for protection of animals used for experimentation or other scientific  
purposes and Catalan Decree 214/1997 of July 30th for the regulation of the use of  
animals for the experimentation or other scientific purposes). During all experimental  
procedures, for hormone administration and sampling, fish were first anaesthetised with  
73 mg L<sup>-1</sup> of MS-222 and placed in a tank with 65 mg L<sup>-1</sup> of MS-222 for manipulation.  
An overdose of MS-222 (250 mg L<sup>-1</sup>) was the method used for the euthanasia of two fish  
in the present study. Death was confirmed by decapitation according to Directive  
2010/63/EU guidelines.

## 148 **2.2. Recombinant Gths production and biological activity**

### **2.2.1. Cloning of *M. cephalus* Gths $\beta$ and $\alpha$ subunits**

150 The pituitary gland was removed from sacrificed fish, frozen in liquid nitrogen, and stored  
152 at -80°C. Total RNA was purified using the GenElute™ mammalian total RNA miniprep  
154 kit (Sigma-Aldrich) according to the manufacturer's instructions, and cDNA synthesis  
156 was performed with 1  $\mu$ g of total RNA following the manufacturer's instructions of the  
158 3'end RACE kit (Invitrogen). Polymerase chain reaction (PCR) was carried out as  
160 indicated in the 3'end RACE kit using partially degenerated forward primers for the Fsh $\beta$   
162 or  $\alpha$  subunits, the common abridged universal amplification primer (AUAP) as reverse  
164 primer, and the EasyA™ high-fidelity PCR cloning enzyme (Agilent Technologies, Santa  
166 Clara, CA, USA). The forward primer for each gene covered the translation initiation  
168 codon ATG and was designed based on sequences available in the GenBank repository  
170 for *Epinephelus coioides* (AY186242), *Oreochromis niloticus* (AY294015),  
172 *Dicentrarchus labrax* (AF543314), *Acanthopagrus schlegelii* (AY921613), *Maylandia*  
174 *zebra* (XM\_004558042), *Fundulus heteroclitus* (M87014), *Oryzias latipes* (AB541981),  
176 *Sparus aurata* (AF300425), *Amphiprion melanopus* (EU908056), *Chrysiptera parasema*  
(KM509061), and *Kryptolebias marmoratus* (EU867505). For Fsh $\beta$ , the forward primer  
was 5'-ATGCAGCTGGTTGTCATGGYAGC-3', whereas for the  $\alpha$  subunit the primer  
was 5'-ATGGGCTCMNTGAAAYCHVCTG-3. The Lh $\beta$  subunit was cloned using a  
degenerate forward primer covering the central region of the RNA (5'-  
CAAYCAGACRRTDTCTCTRGA), designed based on teleost sequences publically  
available (*E. coioides*, AY186243; *O. niloticus*, AY294016; *D. labrax*, AF543315; *A.*  
*schlegelii*, EF605276; *M. zebra*, XM\_004553532; *Pundamilia nyererei* XM\_005741532;  
*F. heteroclitus*, M87015; *Cyprinodon variegatus*, XM\_015404196; *O. latipes*,  
AB541982; *Kryptolebias marmoratus*, XM\_017431834; *Poecilia reticulata*  
XM\_008429103; *Nothobranchius furzeri*, XM\_015975766; *Xiphophorus maculatus*,  
XM\_005816155), and the reverse AUAP primer. The 5' end of the cDNA was further  
amplified using RACE (5'end RACE kit, Invitrogen) and specific primers. In all cases,  
the PCR products were cloned into the pGEM-T Easy vector (Promega Biosciences, LLC,  
San Luis Obispo, CA, USA) and sequenced by BigDye Terminator Version 3.1 cycle  
sequencing on ABI PRISM 377 DNA Analyser (Applied Biosystems, Life Technologies,  
Carlsbad, CA, USA). The nucleotide sequence corresponding to the full-length Lh $\beta$ , Fsh $\beta$

Ramos-Júdez, *et al.*,

180 and  $\alpha$  subunit cDNAs were deposited in GenBank with accession numbers MF574169,  
MF574168 and MF574167, respectively.

### 182 2.2.2. Production of *M. cephalus* rFsh and rLh

184 Recombinant *M. cephalus* rFsh and rLh were produced by Rara Avis Biotec S.L.  
(Valencia, Spain) as described in previous studies [42, 47]. Briefly, the constructs that  
186 encoded a fusion protein containing the coding sequence of the *M. cephalus* Fsh $\beta$  subunit  
(GenBank accession no. MF574168) or Lh $\beta$  (GenBank accession no. MF574169), the 28  
188 amino acids of the carboxyl-terminal sequence of the hCG  $\beta$  and the sequence of the *M.*  
*cephalus* glycoprotein hormone  $\alpha$  subunit (GenBank accession no. MF574167) were  
190 transfected to CHO cells. After a suspension culture of 120 h, the secreted recombinant  
hormones in the culture medium were purified by ion exchange chromatography and  
subsequently concentrated. A semiquantitative Western blot was used to quantify the  
192 hormones (Fig 1) by means of the use of antibody against European seabass (*D. labrax*)  
glycoprotein  $\alpha$  subunit raised in rabbit. Recombinant gonadotropin hormones were stored  
194 at -80 °C until use.

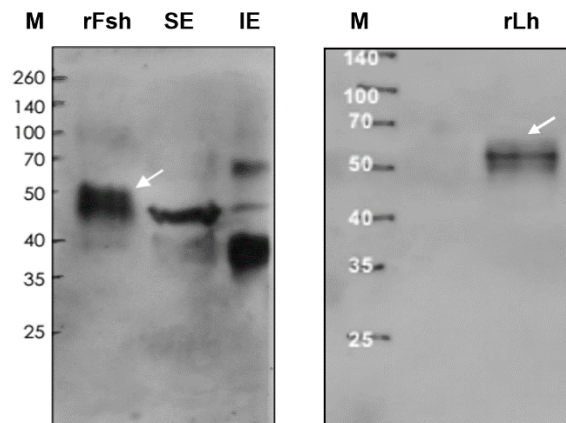

196 **Fig 1. Western blot analyses of culture medium from CHO cells expressing *M. cephalus* rFsh and**  
198 **rLh.** Protein expression of rFsh and rLh was assessed by reaction with a rabbit anti-European seabass  $\alpha$ -  
subunit antisera after culture medium precipitation with ethanol and resuspension in phosphate buffered  
200 saline to a 10x of protein concentration. Thick positive bands (indicated by arrows) with an apparent  
molecular mass from approximately ~60 kDa to ~45 kDa were considered to be rFsh and rLh secreted in  
the medium. M, Molecular weight markers (kDa); SE, soluble cellular extract; SI, insoluble cellular extract.

### 202 2.2.3. *In vivo* dose-response of rFsh on female steroid production

204 To evaluate the biological potency of rFsh produced in CHO cells in inducing 17 $\beta$ -  
estradiol (E<sub>2</sub>) production and to determine the minimum effective dose and optimal  
dosing schedule, a single intramuscular injection of different rFsh doses (0, 3, 6, 9, 12  
206 and 15  $\mu\text{g kg}^{-1}$ ) were administered to immature grey mullet females (five fish per dose  
group) (mean body weight  $0.9 \pm 0.3$  kg). Blood samples (0.40 mL) were collected before  
208 injection (day 0) and at different days (1, 3, 7, 9, 13, 17, 21 days) after injection. Control  
females were injected with CHO conditioned culture medium (1 mL fish<sup>-1</sup>).

Ramos-Júdez, *et al.*,

## 210 **2.3. Experiment 1. Long-term rFsh therapy**

212 In Experiment 1, the recombinant hormone, rFsh, was used in combination with other hormone therapies, GnRHa and hCG, that had been successfully used in earlier studies to induce final maturation in grey mullet [4, 7, 15].

### 214 **2.3.1 Stage 1. Induction of gametogenesis in males and females**

216 Twenty-six immature adult flathead grey mullet were used in the trial. To determine the sex of individuals, a sample of gonadal biopsy was obtained through slight suction with a plastic catheter (1.67 x 500 mm; Izasa Hospital, Barcelona) inserted approximately 5  
218 cm into the gonopore. Individuals were assigned as males if traces of testicular cells were obtained and / or no oocytes were observed in the biopsies. Twelve and fourteen  
220 individuals were randomly assigned to two treatment groups. Nine females and three males (mean  $\pm$  SD body weight  $1 \pm 0.3$  and  $0.9 \pm 0.1$  kg; mean standard body length  $41.4 \pm 4.1$  and  $40.8 \pm 2.4$  cm, respectively) to the treatment group and 11 females and three  
222 males (mean  $\pm$  SD body weight  $1 \pm 0.2$  and  $0.9 \pm 0.1$  kg; mean standard body length  $42 \pm 4.1$  and  $41.3 \pm 1.5$  cm, respectively) to the control group. Only three males were selected  
224 for each group, as only six males were available. The fisheries capture to form the broodstock was biased towards females as has been observed in other studies [48].  
226 Individuals belonging to the treatment group received weekly intramuscular injections of specific grey mullet rFsh at a dose of  $15 \mu\text{g kg}^{-1}$  for 11 weeks (Fig 2). The rFsh dose applied was chosen according to the dose with highest potency on  $E_2$  induction in the *in vivo* dose-response study. The dose and the time frame of administration were also  
228 selected based on the results obtained in a previous study on Senegalese sole (*Solea senegalensis*) using recombinant Gths produced in CHO cells. Chauvigné *et al.* [42] described that a dose of 12 - 17  $\mu\text{g kg}^{-1}$  rFsh was effective in stimulating spermatogenesis,  
234 while the hormone was detectable in the bloodstream for approximately seven days. The control fish were injected in the same manner as rFsh treated fish, but with CHO conditioned culture medium ( $1 \text{ mL fish}^{-1}$ ). Fish were sampled before the first injection  
236 and on different weeks before receiving the corresponding weekly injection. At fortnightly intervals, blood samples ( $0.40 \text{ mL}$ ) from the caudal vein and oocytes through cannulation were obtained. The diameter of the largest oocytes ( $n = 20$ ) were measured  
238 *in situ* and samples were fixed for histology. In parallel, males received a gentle abdominal pressure to check the presence of milt.

### 242 **2.3.2 Stage 2: Induction of oocyte maturation in females**

244 This second stage of the experiment investigated the effects of different hormones to induce oocyte maturation in adult females that were treated with rFsh to induce vitellogenesis to advanced stages. Five females were not used in the second stage and  
246 rFsh administration was stopped, although oocyte changes were assessed until the end of the experiment. Stage 2 focused on the four fish with the most advanced stages of vitellogenesis. One female with a mean maximum oocyte diameter of  $539 \pm 5 \mu\text{m}$  was  
248 treated with GnRHa in combination with Metoclopramide (MET), a dopamine antagonist, according to Aizen *et al.* [15] protocol, which consisted of a priming (GnRHa  $10 \mu\text{g kg}^{-1}$ ; MET  $15 \text{ mg kg}^{-1}$ ) and a resolving (GnRHa  $20 \mu\text{g kg}^{-1}$ ; MET  $15 \text{ mg kg}^{-1}$ ) injection  
250 administered 22.5 h apart. Three females that reached a mean maximum diameter of  $450 \pm 10$ ,  $450 \pm 9$  and  $470 \pm 8 \mu\text{m}$  after rFsh treatment, received weekly consecutive injections  
252 of hCG at increasing doses (1000, 2000, 6000, 12000  $\text{IU kg}^{-1}$ ) in combination with the rFsh treatment ( $15 \mu\text{g kg}^{-1}$ ). One of those females that received hCG injections, was also  
254 treated with one injection of  $9000 \text{ IU kg}^{-1}$  hCG and  $25 \text{ mg kg}^{-1}$  of progesterone (Prolutex,

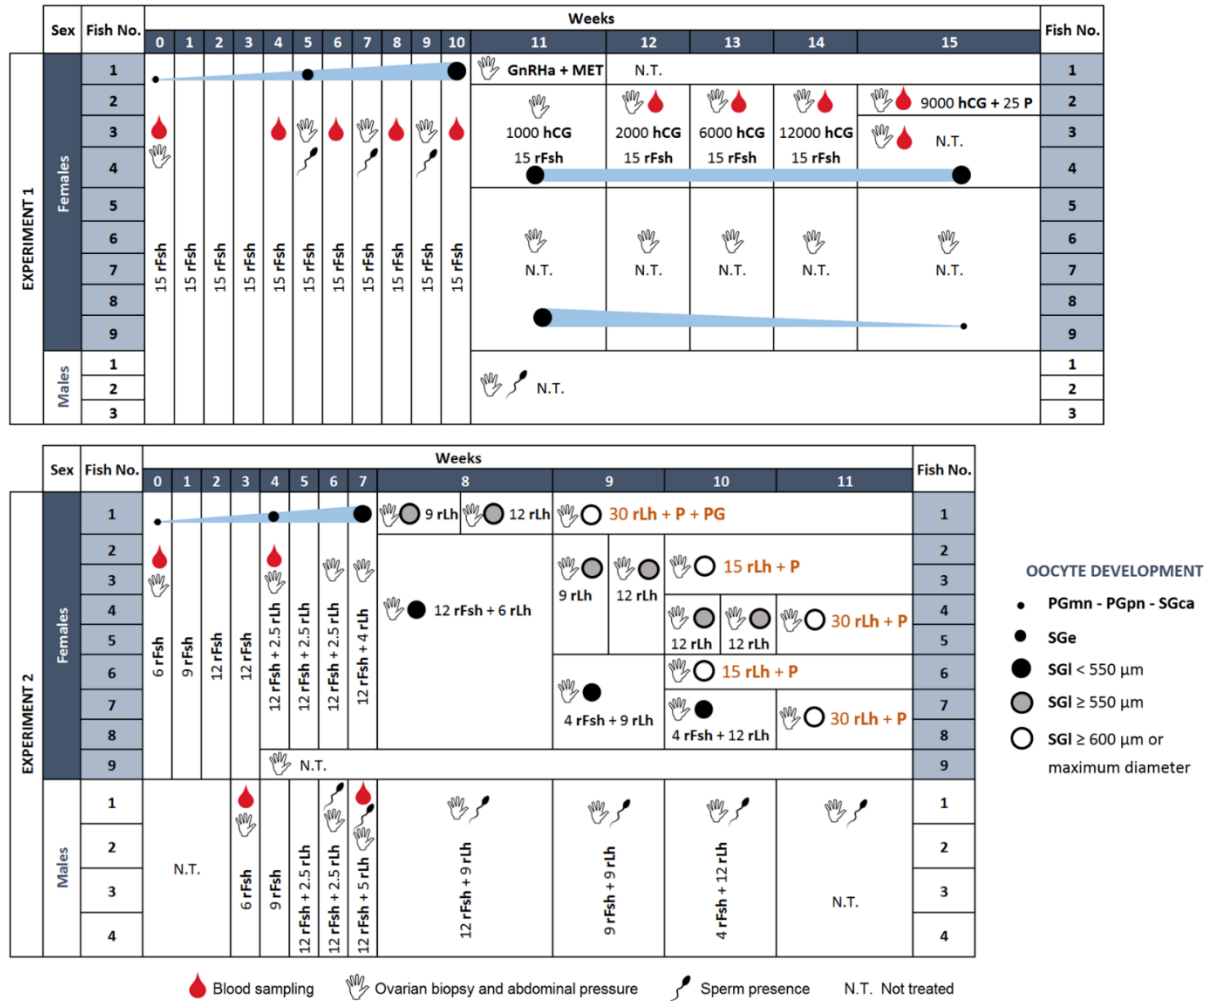

**Fig 2. Schematic representation of the induction protocols administered to flathead grey mullet (*M. cephalus*).** Upper figure represents Experiment 1 and lower figure, Experiment 2. Columns represent weeks of each experiment and rows represent the different fish. In Experiment 1, adult grey mullet females (n = 9) and males (n = 3), received weekly doses of intramuscular injections of rFsh. From 11 weeks onwards, the females with the most advanced stages of vitellogenesis received different weekly treatments. Female 1 received a GnRHα + MET protocol consisted of a priming (GnRHα 10 μg kg<sup>-1</sup>; MET 15 mg kg<sup>-1</sup>) and a resolving (GnRHα 20 μg kg<sup>-1</sup>; MET 15 mg kg<sup>-1</sup>) injection administered 22.5 h apart [15], whilst females 2 - 4 were administered increasing doses of hCG (plus 25 mg kg<sup>-1</sup> of progesterone “P” in one case) in addition to rFsh. In Experiment 2, females (n = 9) received increasing doses of rFsh, and from the 4<sup>th</sup> week combined with increasing doses of rLh, followed by a decrease in rFsh. When females presented ≥ 550 μm oocytes rLh was administered every three days (weeks 9 and 10 for females 2 - 5). When the most developed oocytes reached a diameter of ≥ 600 μm, females were administered higher doses of rLh 15 μg kg<sup>-1</sup> (females 2, 3 and 6) or 30 μg kg<sup>-1</sup> (females 1, 4, 5, 7 and 8) combined with a 40 mg kg<sup>-1</sup> injection of P administered 24 h after the rLh injection to induce oocyte maturation, ovulation and spawning. Female 1 was also administered 18.75 μg kg<sup>-1</sup> of prostaglandin F2α (PG) 39 hours after the rLh injection. In experiment 2, males (n = 4) initiated rFsh treatment on week 3 and were administered a similar, but shortened program of increasing rFsh dose followed with a combined increasing rLh before decreasing rFsh. Doses of rFsh and rLh are expressed in μg kg<sup>-1</sup> and doses of hCG in IU kg<sup>-1</sup>. A hand symbol represents when ovarian biopsies or abdominal massage for sperm were made, red drops represent blood sampling, a spermatozoa represents when males had flowing sperm and circles represent the different stages of oocyte development encountered; small black is primary growth to cortical alveoli stage, medium black is early secondary growth (vitellogenesis), large black is late secondary growth < 550 μm oocyte diameter, large grey is late secondary growth ≥ 550 μm diameter and large white is late secondary growth ≥ 600 μm diameter or maximum diameter achieved.

Ramos-Júdez, *et al.*,

258 IBSA Group, Italy). Dosage of hCG were in the range of previous studies on grey mullet  
260 maturation [4, 7] and other fish species [14]. Weekly samples of oocytes and blood (0.40  
mL) were obtained and the presence of sperm was assessed.

## 2.4. Experiment 2. Combined rFsh and rLh therapy

262 A total of twenty-four adult flathead grey mullet were used in Experiment 2. Fish were  
sexed as in Experiment 1. Females at a body weight of  $0.9 \pm 0.1$  kg (mean  $\pm$  SD) and  
264 standard length of  $38.5 \pm 3.1$  cm, and males at  $0.6 \pm 0.1$  kg and  $33.3 \pm 1.2$  cm formed the  
treatment group, while females at a body weight of  $0.8 \pm 0.1$  kg and standard length of  
266  $39.5 \pm 1.3$  cm and males at  $0.8 \pm 0.1$  kg and  $38.6 \pm 2.7$  cm were used as controls. In this  
trial, 2/3 of the females were immature with previtellogenic ovaries, while 1/3 were at the  
268 beginning of secondary growth (with cortical alveoli stage oocytes). All females were  
randomly distributed between treated and control groups. The aim of the administration  
270 pattern was to simulate natural increases and decreases of gonadotropins in bloodstream  
of individuals according to their suggested regulatory role in gamete development [49].  
272 Initial administration of rFsh followed by a gradual increase of rLh as gametogenesis  
progresses and subsequent decline of rFsh.

### 2.4.1. Females

274 Initially, all nine females received increasing doses of rFsh,  $6 \mu\text{g}^{-1}$  kg (week 0) and  $9 \mu\text{g}^{-1}$   
kg (week 1) before the dose was fixed at  $12 \mu\text{g} \text{kg}^{-1}$  rFsh per week (Fig 2). A maximum  
276  $12 \mu\text{g} \text{kg}^{-1}$  dose was selected for long-term treatment based on Experiment 1 and the *in*  
*vivo* dose-response study. From the 4<sup>th</sup> week onwards, females ( $n = 8$ ) were also  
278 administered a weekly injection of rLh at increasing doses ( $2.5, 4, 6 \mu\text{g} \text{kg}^{-1}$ ). When  
vitellogenesis arrived to advanced stages (week 9), weekly rFsh dose was decreased to  $4$   
280  $\mu\text{g} \text{kg}^{-1}$  while rLh dose was increased ( $9$  and  $12 \mu\text{g} \text{kg}^{-1}$ ). At this point (week 8 and  
onwards), treatments were adjusted accordingly to oocyte diameter of each individual  
282 fish. When females presented oocytes  $\geq 550 \mu\text{m}$ , oocytes were considered to have  
completed vitellogenic growth, therefore, no more rFsh was administered and consecutive  
284 doses starting with  $9$  and maintaining  $12 \mu\text{g} \text{kg}^{-1}$  rLh were administered every 3 days. The  
aim of this increased frequency of administration was to maintain high levels of rLh in  
286 the bloodstream, based on the half-life described for rLh produced in CHO cells and  
administered to Senegalese sole [42]. When the most developed oocytes reached a  
288 diameter  $\geq 600 \mu\text{m}$  or did not show further growth, females were administered higher  
doses of rLh ( $15$  or  $30 \mu\text{g} \text{kg}^{-1}$ ) combined with a  $40 \text{mg} \text{kg}^{-1}$  injection of progesterone  
290 (Prolutex, IBSA Group, Italy) administered 24 h after the rLh injection to induce oocyte  
maturation, ovulation and spawning (see schematic representation of the experimental  
292 setup in Fig 2). Three females received  $15 \mu\text{g} \text{kg}^{-1}$  of rLh and five females received  $30 \mu\text{g}$   
294  $\text{kg}^{-1}$ .

After the application of rLh, females were placed in a  $10 \text{m}^3$  tank with spermiating males.  
296 Surface out-flow egg collectors were placed to receive eggs from the tanks and were  
checked for eggs regularly. The fish were also observed frequently (from outside of the  
298 tank), for swelling of the abdomen (hydration) in females and the initiation of courtship  
behaviour. These frequent checks were made as there is no established latency time of  
300 spawning for rGth treatments. Latency time reported for grey mullet after resolving doses  
from other hormone treatments varies from 17 to 48 hours at  $22 - 25 \text{ }^\circ\text{C}$  [7, 50]. One  
302 female (female 1,  $30 \mu\text{g} \text{kg}^{-1}$  rLh +  $40 \text{mg} \text{kg}^{-1}$  P in Fig 2) that had oocytes  $\geq 600 \mu\text{m}$   
earlier (week 8) than the other females, developed a large swollen belly without ovulation  
304 and was administered  $18.75 \mu\text{g} \text{kg}^{-1}$  of prostaglandin F<sub>2</sub> $\alpha$  (VETEGLAN, Laboratorios



Ramos-Júdez, *et al.*,

306 Calier, S.A., Spain) 39 hours after the rLh injection. The other seven females (females 2  
- 8 in Fig. 2) did not receive prostaglandins and were checked and/or stripped as there  
308 was no natural spawning. Four females ovulated and were stripped, one female (female  
1) at 40 h and three (females 4, 5 and 7) at  $48 \pm 0.5$  h after the rLh injection. Total number  
310 of eggs (fecundity) was estimated by counting the number of eggs in triplicate in a  
subsample of 500  $\mu$ l.

312 The seven females in the control group underwent the same number of intramuscular  
injections as treated females but with CHO culture medium (1 mL fish<sup>-1</sup>). Females were  
314 sampled for oocyte tissue (weeks 0, 4, 6, 7, 8, 9, 10, 11, immediately before hormone  
administration) and blood (week 0 – before treatment, week 4 – after 3 weeks of rFsh  
treatment).

#### 316 **2.4.2. Males**

318 The treatment of males in the rGth group (n = 4) initiated three weeks after the females  
in order to synchronise development of both sexes and have sperm and eggs available at  
the same time for fertilisation. The same rFsh doses were applied as for females and the  
320 dose range of rLh was fixed accordingly to other studies in male spermatogenesis and  
spermiogenesis [43, 45].

322 The four males in the control group were treated as previously reported for control groups.  
Males were sampled for sperm (weeks 3, 6, 7, 8, 9, 10 and 11 of the experiment) and  
324 blood (week 3 – before treatment, week 7 – after 3 weeks of hormone treatment).

#### **2.4.3. *In vitro* fertilisation**

326 For the *in vitro* fertilisation, sperm from three males was obtained, diluted 1:4 in the  
extender solution Marine Freeze® (IMV Technologies, France) that showed the best  
328 results for sperm conservation in a marine species [51] and stored at 4°C to fertilise the  
eggs. The eggs from each female (n = 3) were stripped and total volume registered.  
330 Aliquots of 0.5 mL of eggs (~1200 eggs) from each female were each fertilised in  
triplicate with a pool of 60  $\mu$ L of diluted sperm (20  $\mu$ L from each of the three males,  
332 ~190,000 spermatozoa egg<sup>-1</sup>) (3 females x 3 triplicates = 9 fertilisations). The diluted  
sperm was pipetted directly onto the 0.5 mL of eggs in a 100 mL beaker and immediately  
334 activated by mixing the eggs and sperm with 5 mL of clean tank water. After 5 minutes,  
the beaker was filled to 100 mL with clean tank water and placed in a temperature-  
336 controlled incubator (24°C) to incubate the eggs. Twenty-two hours after fertilisation, all  
eggs were checked for embryo development and the percentage of eggs fertilised was  
338 calculated as the number of eggs with live embryos/number of eggs used for the *in vitro*  
fertilisation. Eggs with embryonic development were transferred individually into  
340 individual wells filled with sterile seawater in a 96 well plate and incubated (24°C). The  
hatching success was calculated as the number of hatched larvae/live 22-hours embryos.  
342 Larvae was checked every 24 h until all hatched larvae had died and larval survival rate  
was calculated as the number of live larvae / larvae that hatched. A subsample of ~1/3  
344 fertilised eggs and larvae were used for taking measurements and afterwards returned to  
the incubation.

#### 346 **2.5. Plasma steroid analysis**

Blood samples were centrifuged at 3,000 rpm at 4 °C for 15 min and the plasma stored at  
348 -80 °C until steroid analysis. Plasma levels of E<sub>2</sub> and 11-ketotestosterone (11-KT) were  
measured for females and males, respectively, and were analysed using a commercially  
350 available enzyme immunoassay (EIA) kits (Cayman Chemical Company, USA). Steroids

Ramos-Júdez, *et al.*,

352 were extracted with methanol, which was evaporated and extracts were re-suspended 1:10  
in the EIA buffer.

## 2.6. Histological observations and classification of developing ovaries

354 Ovarian biopsy samples were preserved in Bouin's fluid, dehydrated through an ethanol  
series and embedded in paraffin. Histological sections (3  $\mu\text{m}$ ) were stained with  
356 hematoxylin and eosin (Casa Álvarez, Spain). To examine ovarian development, oocytes  
sections were observed under a light microscope (Leica DMLB, Houston, USA).  
358 Quantification of the percentage of oocytes in different stages in the ovaries among weeks  
was made by the identification of 50 - 100 random oocytes per female. Oocyte  
360 developmental stage was based on the identification of structures, morphological changes  
and increasing oocyte diameter. Oocytes were classified as: *multiple nucleoli step of*  
362 *primary growth (PGmn)* characterised by small oocytes with multiple nucleoli that were  
not situated in the periphery of the germinal vesicle, *perinucleolar step of primary growth*  
364 *(PGpn)*, with the nucleoli located around the internal germinal vesicle membrane, *cortical*  
*alveoli step (SGca)*, determined by the presence of small oil droplets and granular vesicles  
366 "cortical alveoli" in the peripheral ooplasm, *early secondary growth (SGe)*, with the  
appearance of yolk globules and with this the initiation of vitellogenesis, *late secondary*  
368 *growth (SGl)*, when oocytes reached  $\geq 450 \mu\text{m}$ , *oocyte maturation stage (OM)*, with the  
identification of coalesced oil droplets and the displacement of the germinal vesicle to the  
370 ooplasm periphery and some hydration and coalescence of yolk globules, and *ovulation*  
*stage (OV)*, when one large yolk globule is observed [3, 19, 52].

## 372 2.7. Sperm collection and evaluation

Sperm samples were collected in a 1 mL syringe avoiding the contamination by faeces,  
374 urine and / or sea water. Approximately 1  $\mu\text{L}$  of sperm was placed on a microscope slide  
beside a 0.2 mL of sea water, mixed to activate the spermatozoids and immediately (first  
376 10 seconds) observed through a microscope at 100x magnification (Zeuss Microscopes).  
The assessment of the milt quality was estimated by the percentage of motile spermatozoa  
378 and by the total duration of the movement from sperm activation until all forward  
movement of spermatozoa stopped. The observations were made in triplicate and the  
380 percentage of motile spermatozoa was classified into different motility scores: 0 for no  
motile sperm, 1 for  $> 0 - 25 \%$  of sperm with progressive movement, 2 for  $> 25 \%$  - 50  
382  $\%$  of sperm with progressive movement, 3 for  $> 50 - 75 \%$  and 4 for  $> 75 \%$  of sperm  
with progressive movement [53]. For those samples in Exp. 2 with a motility score of 4  
384 and manageable sperm volumes ( $\geq 100 \mu\text{L}$ ) ( $n = 10$ ), sperm quality was also evaluated  
using a CASA system [54]. For this, 0.5  $\mu\text{L}$  of diluted sperm (1/4 in Marine Freeze®)  
386 were dropped on the centre of a slide and activated using 20  $\mu\text{L}$  of sea water. A 1  $\mu\text{L}$   
sample containing the activated spermatozoa was pipetted into an ISAS counting chamber  
388 (Integrated Sperm Analysis System, Spain). The tracks of the activated spermatozoa were  
recorded through a bright field equipped video microscope at 200x magnification  
390 (Olympus BH Microscope and DMK 22BUC03 Camera with 744 $\times$ 480 "0.4 MP"  
resolution at 60 FPS, The Imaging Source Europe GmbH, Bremen, Germany). The video  
392 sections from 15 to 17 s after activation were transformed to image sequences using  
VIRTUALDUB 1.9.11 (virtualdub.org) free software. The spermatozoa in each field  
394 were selected by adjusting the grayscale threshold through Image J software  
(<https://imagej.nih.gov/ij/>). The following sperm quality parameters were determined: (1)  
396 sperm motility (%), (2) sperm velocity ( $\mu\text{m s}^{-1}$ ): the curvilinear velocity (VCL), straight-  
line velocity (VSL) and average path velocity (VAP), (3) sperm movement trajectory:  
398 path linearity of actual sperm track,  $\text{LIN} = \text{VSL}/\text{VCL} \times 100$ ), path wobble (deviation from

Ramos-Júdez, *et al.*,

400 average path,  $WOB = VAP/VCL \times 100$ ), and path straightness (linearity of the average path,  $STR = VSL/VAP \times 100$ ). All parameters were evaluated in triplicate for each sperm sample.

402 Sperm concentration was also recorded for each sperm sample used. In this case, sperm was diluted 1/1000 and 10  $\mu\text{L}$  were pipetted into a THOMA cell counting chamber where  
404 it was allowed to settle for 10 min, and then, was observed under the microscope at 100x magnification. The estimated densities are expressed as the number of spermatozoa per  
406 mL of sperm ( $\text{spz mL}^{-1}$ ). Quantification of spermatozoa was conducted using ImageJ software.

## 408 **2.8. Statistical analysis**

Shapiro-Wilk and Levene tests were used to check the normality of data distribution and variance homogeneity, respectively. Oocyte diameter data (Stage 1 from Exp. 1 and Exp. 2),  $E_2$  levels (Stage 1 from Exp. 1 and 2) and 11-KT levels (Exp. 1) were normalised with the ln log transformation. For oocyte diameter,  $E_2$  levels and 11-KT levels (Stage 1 from Exp. 1 and Exp. 2) a two-way repeated-measures (RM) ANOVA followed by Dunnett's test was used to compare to the control, which was the control group and week 0 of treatment. A t-student was used to compare oocyte diameter before and after the Stage 2 treatments in Experiment 1. Differences in weekly  $E_2$  levels in Stage 2 (Exp. 1) treatments were examined by one-way RM ANOVA. Statistical differences in the dose-response test and in sperm characteristics (density, duration) among weeks were examined by a one-way repeated-measures analysis of variance (ANOVA) followed by the Holm-Sidak test for pairwise comparisons. Analyses were performed using SigmaPlot version 12.0 (Systat Software Inc., Richmond, CA, USA). Significance was set at  $P < 0.05$ . Data is presented as mean  $\pm$  standard error (SEM) unless indicated otherwise.

## 3. Results

### 424 **3.1. *In vivo* dose-response of rFsh on female steroid production**

There were no increases from the  $E_2$  basal values after the application of doses of 3, 6 and  
426 9  $\mu\text{g kg}^{-1}$  of rFsh (Fig 3). A great individual variation in magnitude of response was observed when a dose of 9  $\mu\text{g kg}^{-1}$  was administered. The administration of 12  $\mu\text{g kg}^{-1}$  of  
428 rFsh produced significant increases in  $E_2$  levels on 3 to 6 days after the injection. The highest average levels of  $E_2$  were obtained 3 days after the injection of 15  $\mu\text{g kg}^{-1}$ .  
430 Therefore, the doses of 12 to 15  $\mu\text{g kg}^{-1}$  of rFsh were the most effective to stimulate  $E_2$  production and were considered the most appropriate for the induction experiments.

### 432 **3.2. Experiment 1: Effect of long-term rFsh therapy**

#### **3.2.1. Female development**

##### 434 **3.2.1.1. Stage 1: Gametogenesis induction in females**

Weekly injections of 15  $\mu\text{g kg}^{-1}$  rFsh during eleven weeks to immature females generated  
436 a significant increase (2 - 10 weeks) in the plasma levels of  $E_2$  compared to the control group ( $P < 0.001$ ) (Fig 4). Among the untreated females (control), plasma  $E_2$  levels  
438 remained unchanged at basal levels during the experimental period (0 - 10 weeks). *In situ* and histological observation of oocytes obtained by cannulation indicated that rFsh  
440 induced a significant increase of oocytes diameter ( $P < 0.001$ ) (Fig 5A) and vitellogenic growth (Fig 6) compared to the control group.

Ramos-Júdez, *et al.*,

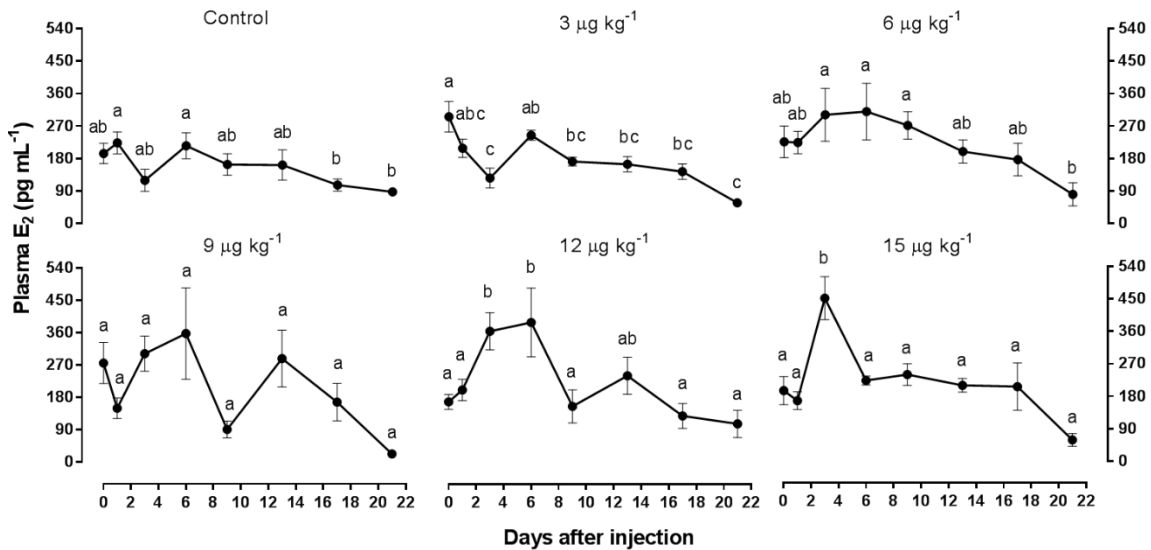

442

444 **Fig 3. Mean ( $\pm$  SEM) plasma E<sub>2</sub> levels of female flathead grey mullet (*M. cephalus*) before (day 0) and**  
 446 **after (day 1, 3, 6, 9, 13, 15 and 21 days) the rFsh injection.** Females (n = 5/group) received a single injection of rFsh at doses 3, 6, 9, 12 or 15  $\mu\text{g kg}^{-1}$  and an injection of 1 mL fish<sup>-1</sup> CHO conditioned culture medium for control. Different letters indicate significant differences ( $P < 0.05$ ) over time within each dose.

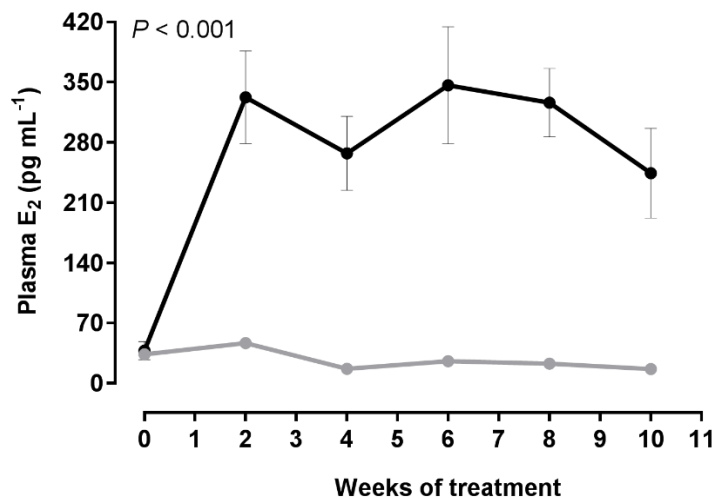

448 **Fig 4. Mean ( $\pm$  SEM) plasma E<sub>2</sub> levels of rFsh-treated and control flathead grey mullet (*M. cephalus*)**  
 450 **females (n = 9-11) in Experiment 1.** Treated females received weekly injections of rFsh (15  $\mu\text{g kg}^{-1}$ ) and control females of CHO conditioned culture medium (1 mL fish<sup>-1</sup>). There were significant differences among treatments (two-way repeated measures ANOVA,  $P < 0.001$ ).

452 At the beginning of the treatment all individuals, but one presented oocytes at the PGpn (mean maximum diameter =  $97 \pm 4 \mu\text{m}$ ) as the most developed stage (Fig 6). Just one  
 454 female assigned to the rFsh-treated group presented most developed oocytes at PGmn. After 5 weeks of treatment, all rFsh-treated females (89%) but one responded to rFsh and  
 456 had vitellogenic oocytes. These vitellogenic females had populations of oocytes at different stages of development: PGpn, PGca, SGe and SGI with the most abundant stage  
 458 being secondary growth oocytes (Fig 7A). In addition, some traces of atresia appeared in some females. In the two subsequent revisions (weeks 7 and 9), SGI oocytes were the

Ramos-Júdez, *et al.*,

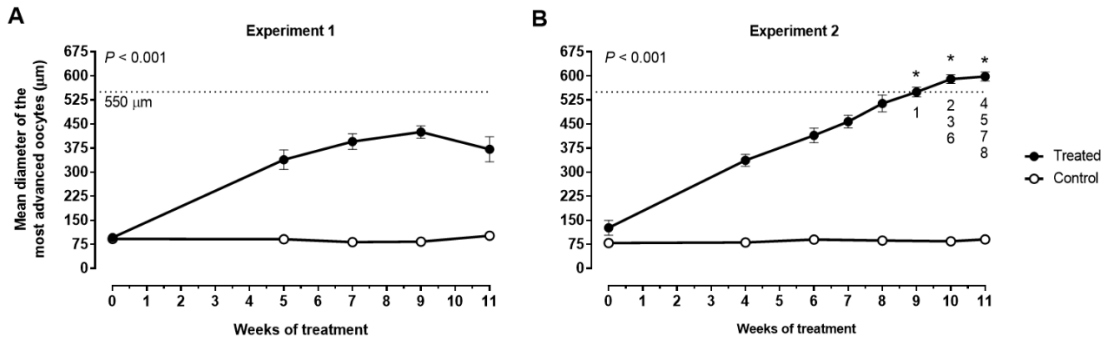

460 **Fig 5. Mean ( $\pm$  SEM) oocyte diameter of the most developed oocytes in wet mounts from rFsh treated**  
 462 **and control flathead grey mullet (*M. cephalus*) females.** (A) Experiment 1, females treated (n = 9) with  
 464 a weekly  $15 \mu\text{g kg}^{-1}$  rFsh administration or CHO conditioned culture medium (control, n = 11) during 11  
 466 weeks. (B) Experiment 2, females treated (n = 9) with initial increasing doses of rFsh followed by increases  
 468 in rLh and subsequent rFsh decrease or CHO conditioned culture medium (control, n = 7). Values used for  
 females checked twice in the same week were the mean of both revisions. Asterisks show the moment when  
 numbered females (see Fig 2) were selected for maturation and ovulation induction. There were significant  
 differences between treated and control groups (two-way repeated measures ANOVA,  $P < 0.001$ ). Dotted  
 line indicates oocyte size recommended for the hormonal induction of oocyte maturation.

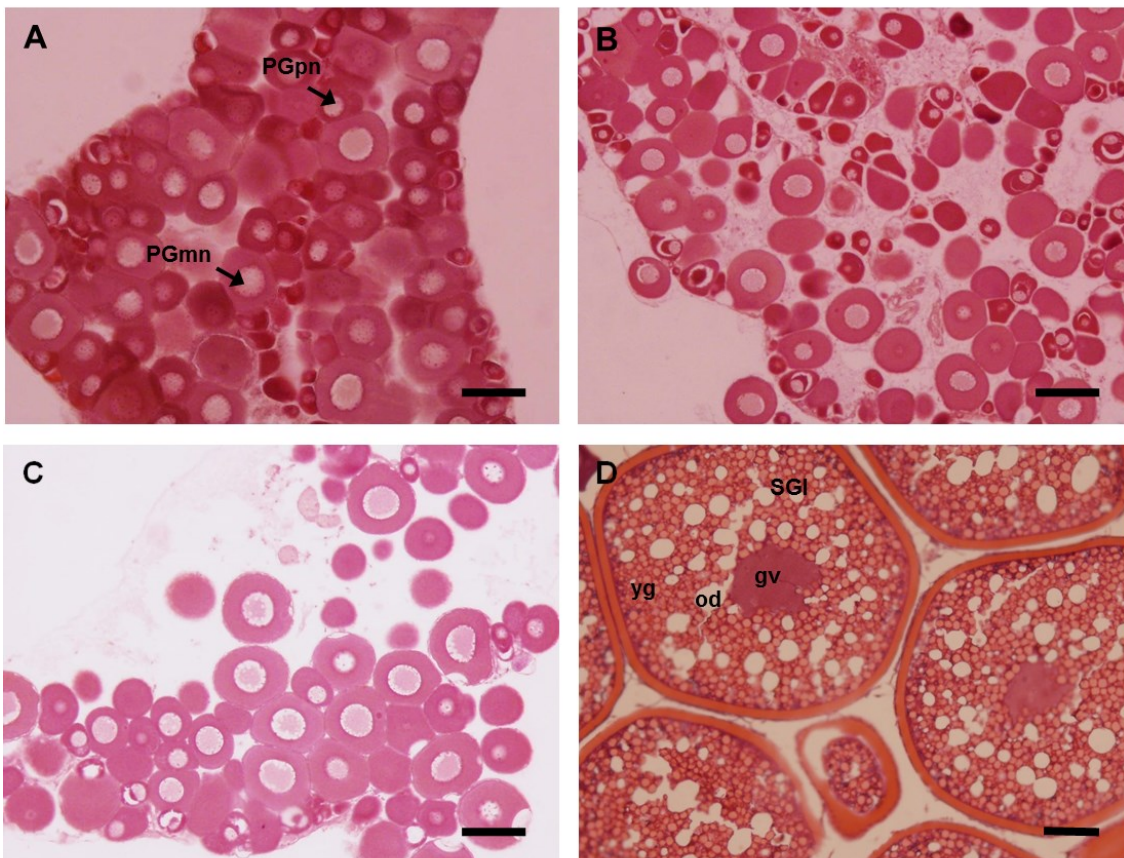

470 **Fig 6. Effects of long-term treatment of rFsh on ovarian development in previtellogenic flathead grey**  
 472 **mullet (*M. cephalus*) *in vivo*.** Histological sections stained with hematoxylin and eosin show oocytes  
 474 samples from (A) initial control fish, (B) rFsh-treated fish before treatment, (C) control fish after 7 weeks  
 476 and (D) rFsh-treated fish after 7 weeks of treatment (weekly  $15 \mu\text{g kg}^{-1}$  rFsh). gv, germinal vesicle; nu,  
 nucleolus; od, oil droplets; PGpn, perinucleolar primary growth oocyte; PGmn, multiple nucleoli primary  
 growth oocyte; SGI, late secondary growth oocyte; yg, yolk globules. Scale bar: 100  $\mu\text{m}$ .

Ramos-Júdez, *et al.*,

478 most abundant with a maximum size of  $425 \pm 19 \mu\text{m}$  in diameter (Fig 5A). After 9 weeks  
of treatment, the proportion of atresia observed in the vitellogenic ovaries increased from  
480 three to 24 % and after 11 weeks of treatment the proportion of SGI oocytes decreased  
482 while population of oocytes at SGe increased (Fig 7A). The female that at the start of the  
experiment before any treatment had oocytes at PGmn was delayed compared to other  
484 females and only developed to SGe after 11 weeks of treatment. In comparison, the  
oocytes of all (100%) untreated females remained at primary growth (perinucleolar stage)  
486 during the entire experiment (Figs 6, 7A). When rFsh administration for five females was  
ceased from week 11 onwards, the morphology of the ovary returned to primary growth  
oocytes after five weeks.

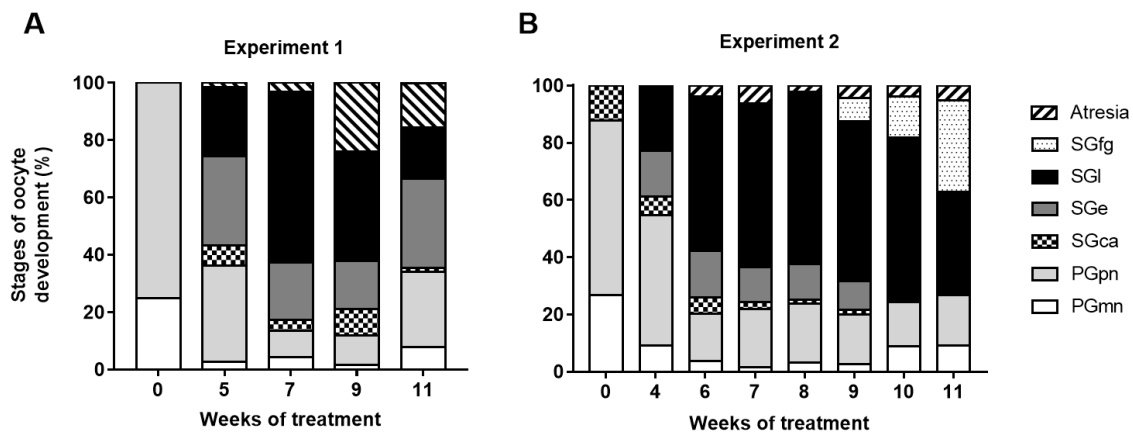

488 Fig 7. Temporal weekly evolution of percentage frequency of oocyte developmental stages observed in  
490 rFsh treated flathead grey mullet females (*M. cephalus*). (A) Experiment 1 with weekly  $15 \mu\text{g kg}^{-1}$  rFsh  
492 administration to the treated group ( $n = 9$ ) during 11 weeks. (B) Experiment 2 with the administration of  
494 initial increasing doses of rFsh followed by increases in rLh and subsequent rFsh decrease ( $n = 9$ ). PGmn,  
multiple nucleoli step of primary growth; PGpn, perinucleolar primary growth oocyte; SGca, cortical  
alveoli step; SGe, early secondary growth; SGI, late secondary growth oocyte; SGfg, full-grown secondary-  
growth oocytes.

### 3.2.1.2. Stage 2: Induction of oocyte maturation

496 None of the treatments (priming and resolving GnRHa and MET injections, doses of  
1000, 2000, 6000, 12000 IU  $\text{kg}^{-1}$  hCG combined with  $15 \mu\text{g kg}^{-1}$  rFsh, and 9000 IU  $\text{kg}^{-1}$   
498 hCG with  $25 \text{ mg fish}^{-1}$  of progesterone) induced oocyte maturation. Histological  
examination of the oocytes after each treatment did not show variations in oocyte  
500 morphology or stage although a significant low increase in oocyte diameter was observed  
in the female injected with GnRHa+MET protocol (Table 1). High  $\text{E}_2$  levels were  
502 maintained during the period of weekly hCG injection (week 12:  $186.5 \pm 20.6$ , week 13:  
 $258.3 \pm 35.1$ , week 14:  $241.1 \pm 42.1$  and week 15:  $184.5 \pm 30.8 \text{ pg mL}^{-1}$ ) that were not  
504 significantly different from  $\text{E}_2$  levels ( $391.4 \pm 56.5 \text{ pg mL}^{-1}$ ) during weeks 4 - 10 (Stage  
1) in the same group.

### 506 3.2.2. Male development.

Two of three (66.6%) rFsh-treated males produced sperm after five weeks of treatment  
508 that coincided with an increase in 11-KT levels ( $P = 0.043$ ,  $\alpha = 0.05$ , statistical power =  
0.66). One male that did not produce flowing sperm was humanly sacrificed with an  
510 overdose of MS-222 on week 9, had a gonad somatic index (GSI) of 0.17 and spermatozoa

258 **Table 1.** Effects of treatments applied to flathead grey mullet (*M. cephalus*) to induce oocyte maturation and ovulation in Stage 2 from Experiment 1. Differences (t-student,  $P$   
 260  $< 0.05$ ) between maximum oocyte diameter (mean  $\pm$  SEM) reached with rFsh treatment at Stage 1 and final oocyte diameter after corresponding treatments are indicated by  
 different letters for each female.

| Fish No. | Max. oocyte diameter reached with rFsh at Stage 1 ( $\mu\text{m}$ ) | Priming GnRHa ( $\mu\text{g kg}^{-1}$ ); MET ( $\text{mg kg}^{-1}$ ) | Resolving GnRHa ( $\mu\text{g kg}^{-1}$ ); MET ( $\text{mg kg}^{-1}$ ) | Weekly rFsh ( $15 \mu\text{L kg}^{-1}$ ); hCG ( $\text{IU kg}^{-1}$ ) | hCG ( $\text{IU kg}^{-1}$ ); progesterone ( $\text{mg kg}^{-1}$ ) | Final max. oocyte diameter at Stage 2 ( $\mu\text{m}$ ) |
|----------|---------------------------------------------------------------------|----------------------------------------------------------------------|------------------------------------------------------------------------|-----------------------------------------------------------------------|-------------------------------------------------------------------|---------------------------------------------------------|
| 1        | $539 \pm 5^a$                                                       | 10; 15                                                               | 20; 15                                                                 | -                                                                     | -                                                                 | $569 \pm 10^b$                                          |
| 2        | $450 \pm 10^a$                                                      | -                                                                    | -                                                                      | 1000, 2000, 6000, 12000                                               | 9000; 25                                                          | $470 \pm 6^a$                                           |
| 3        | $450 \pm 9^a$                                                       | -                                                                    | -                                                                      | 1000, 2000, 6000, 12000                                               | -                                                                 | $422 \pm 8^b$                                           |
| 4        | $470 \pm 8^a$                                                       | -                                                                    | -                                                                      | 1000, 2000, 6000, 12000                                               | -                                                                 | $490 \pm 8^a$                                           |

262 **Table 2.** Individual flathead grey mullet (*M. cephalus*) oocyte diameter of most advanced stages (mean  $\pm$  SEM), hormone treatment and egg fecundity data in Experiment 2. PGpn, perinucleolar primary growth oocyte; SGca, cortical alveoli step.

| Fish No. | Most developed oocyte stage | Max. oocyte diameter before induction ( $\mu\text{m}$ ) | rLh ( $\mu\text{g kg}^{-1}$ ) (t = 0) | Progesterone ( $\text{mg kg}^{-1}$ ) (t = 24) | Prostaglandins ( $\text{mg kg}^{-1}$ ) (t = 25) | Total eggs | Fecundity (eggs $\text{kg}^{-1}$ bw) | Fertilisation rate (%) |
|----------|-----------------------------|---------------------------------------------------------|---------------------------------------|-----------------------------------------------|-------------------------------------------------|------------|--------------------------------------|------------------------|
| 1        | SGca                        | $625 \pm 8$                                             | 30                                    | 40                                            | 18.75                                           | 801,913    | 832,723                              | Not used               |
| 2        | PGpn                        | $619 \pm 7$                                             | 15                                    | 40                                            | -                                               | -          | -                                    | -                      |
| 3        | SGca                        | $627 \pm 8$                                             | 15                                    | 40                                            | -                                               | -          | -                                    | -                      |
| 4        | PGpn                        | $603 \pm 10$                                            | 30                                    | 40                                            | -                                               | 974,928    | 574,500                              | 0.1                    |
| 5        | SGca                        | $608 \pm 8$                                             | 30                                    | 40                                            | -                                               | 754,774    | 676,320                              | 0.31                   |
| 6        | PGpn                        | $610 \pm 6$                                             | 15                                    | 40                                            | -                                               | -          | -                                    | -                      |
| 7        | PGpn                        | $578 \pm 7$                                             | 30                                    | 40                                            | -                                               | 891,600    | 888,047                              | 0.81                   |
| 8        | PGpn                        | $605 \pm 4$                                             | 30                                    | 40                                            | -                                               | -          | -                                    | -                      |

Ramos-Júdez, *et al.*,

258 were observed in the histology. Control group males did not produce sperm. The  
260 production of sperm was prolonged for 4 and 6 weeks in the two spermiating males but  
262 sperm volumes were low ( $29.3 \pm 6.1 \mu\text{L}$ ). Sperm was white in colour and highly viscous,  
264 which made it difficult to manipulate. The mean sperm concentration was  $4.6 \pm 1.5 \cdot 10^{10}$   
spermatozoa  $\text{mL}^{-1}$  and no significant differences were observed among individuals  
between weeks. The motility grade recorded was 4 ( $> 75\%$  sperm with progressive  
movement) and the mean motility duration was  $40 \pm 2$  seconds with no significant  
differences between weeks.

### 266 **3.3. Experiment 2: Effect of combined rFsh and rLh therapy**

#### 268 **3.3.1. Female development.**

268 Histology showed that at the beginning of the treatment, those females from semi-  
extensive culture and with less time in intensive captive conditions (3 months) had  
270 oocytes in cortical alveoli stage (2 were in the control group and 3 in treated group, Table  
2), while the wild individuals with 12+ months in captivity had primary growth  
272 perinucleolar stage as the most advanced stage of gonadal development (5 in control  
group and 6 in treated group, Table 2).

274 As in Experiment 1, the administration of rFsh significantly ( $P < 0.001$ ) increased the  
production of  $E_2$  (week 0:  $123.9 \pm 27.4$ ; week 4:  $458.7 \pm 113 \text{ pg mL}^{-1}$ ) compared to the  
276 control group (week 0:  $95.6 \pm 21.5$ ; week 4:  $81.1 \pm 18.7 \text{ pg mL}^{-1}$ ). This increase in  $E_2$   
levels in Exp 2, was achieved despite of using a lower and increasing dose during the first  
278 weeks (Fig 2). After the first 4 weeks of treatment, all but one female (89 %) had  
vitellogenic oocytes. The treatment of the delayed non-vitellogenic female (female 9 in  
280 Fig 2) was stopped, even though the diameter of the most developed oocytes had  
increased significantly from week 0 ( $89 \pm 2 \mu\text{m}$ ) to week 4 ( $167 \pm 3 \mu\text{m}$ ). Oocyte growth  
282 of all other females followed the same pattern as observed in Exp 1 during the first 7  
weeks of treatment (Fig 7). However, during the following weeks, with the administration  
284 of rLh, the proportion of atresia was reduced (week 9 = 4%) in comparison with Exp 1  
(24%) in which just rFsh was administered. The inclusion of rLh in Exp 2 also increased  
286 the mean diameter of the most advanced oocytes compared to Exp 1 (Fig 5A vs 5B). The  
response to treatment was different between females, which reached a  $\geq 550 \mu\text{m}$  oocyte  
288 diameter at different time points between week 8 and 11. Full-grown oocytes obtained  
prior to maturation induction had a mean diameter of  $609 \pm 5 \mu\text{m}$ . As in Exp 1, all (100%)  
290 control females showed no oocyte growth or development.

Only those females ( $n = 5$ ) that received  $30 \mu\text{g kg}^{-1}$  of rLh followed by  $40 \text{ mg kg}^{-1}$  of  
292 progesterone, presented oocyte maturation (OM), hydration and ovulation. Four females  
showed the initiation of OM indicated by oil globule coalescence after 24 h from rLh  
294 injection. From these females, female 1 had not ovulated 39 hours after rLh administration  
when an injection of prostaglandin  $F_{2\alpha}$  was administered. The prostaglandin appeared to  
296 induce ovulation and, one hour after administration, poor quality eggs were stripped that  
were not used for fertilisation. Posterior histological analysis showed that the eggs were  
298 not fully hydrated (Fig 8A and Table 2). Three females, females 4, 5 and 7, which were  
checked at  $48 \pm 0.5$  hours from rLh injection, had ovulated (Fig 8B) and eggs were used  
300 for *in vitro* fertilisation (Table 2). The mean relative fecundity was  $742,900 \pm 71,840 \text{ eggs}$   
 $\text{kg}^{-1} \text{ bw}$ . Female 8 did not ovulate and at  $48 \pm 0.5$  hours after rLh administration only  
302 presented oocytes in OM.



Ramos-Júdez, *et al.*,

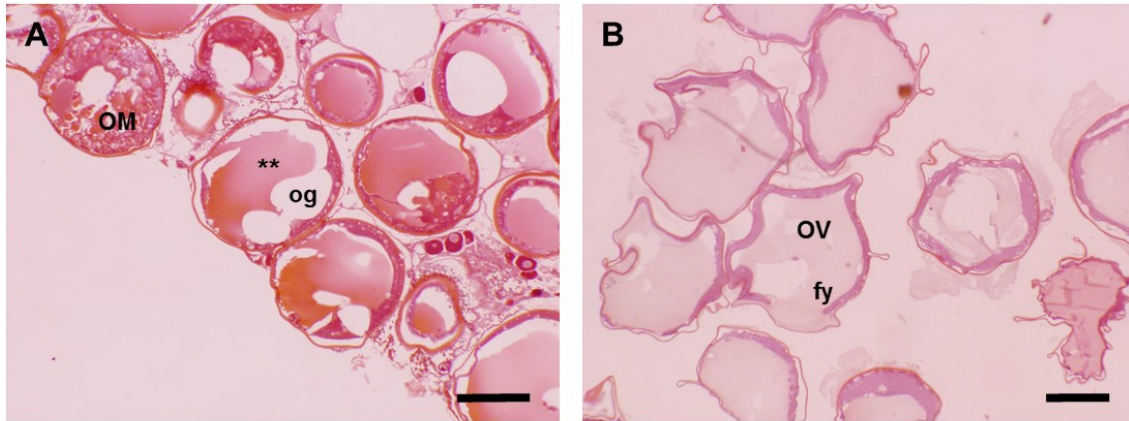

304 **Fig 8. Oocyte maturation and hydration stages for treated flathead grey mullet females (*Mugil***  
306 ***cephalus*) in Experiment 2.** (A) Ovulated eggs from female 1 at 40 hours after  $30 \mu\text{g kg}^{-1}$  of rLh injection  
308 (16 hours from  $40 \text{ mg kg}^{-1}$  progesterone) and 1 hour from  $18.75 \mu\text{g kg}^{-1}$  prostaglandin F $2\alpha$  injection.  
310 Oocytes in maturation: yolk globules coalesce and fuse to form a one large globule (\*\*). Central oil globule  
312 displaces the germinal vesicle into an eccentric position. (B) Ovulated eggs from three females (females  
4, 5 and 7) at approx. 48 hours after  $30 \mu\text{g kg}^{-1}$  of rLh injection (24 hours from  $40 \text{ mg kg}^{-1}$  progesterone).  
Oocytes have undergone hydration after completion of germinal vesicle breakdown with homogenous fluid  
yolk. fy, fluid yolk; og, oil globules; OM, oocyte maturation; OV, hydrated oocytes at ovulation stage.  
Scale bar: 500  $\mu\text{m}$ .

### 3.3.2. Male development.

314 Along the course of the treatment, all males ( $n = 4$ ) produced sperm which also coincided  
with an initial significant increase in 11-KT levels in the treated group ( $P = 0.006$ ,  $\alpha =$   
316  $0.05$ , statistical power = 0.97) (week 3:  $2.2 \pm 0.7$ ; week 7:  $10.5 \pm 2.2 \text{ ng mL}^{-1}$ ) in  
comparison with the control group (week 3:  $0.7 \pm 0.3$ ; week 7:  $0.5 \pm 0.2 \text{ ng mL}^{-1}$ ).  
318 Spermiating males were observed at week 6 (50% of males), week 7 (75 %) and from  
week 8 to 11 (100 %). First traces ( $38.7 \pm 14.4 \mu\text{L}$ ) were white and highly viscous (week  
320 6 to 8) as described in Exp 1 with a motility score of 2 to 4 (25 to > 75% motility). At  
week 9 higher quantities of sperm were obtained ( $242.5 \pm 70.9 \mu\text{L}$ ) that decreased ( $68.6$   
322  $\pm 21.7 \mu\text{L}$ ) at weeks 10 and 11. Viscosity decreased and motility score was 4 for all males  
until the end of the treatment. Sperm concentration of the first samples (from weeks 6, 7  
324 and 8) (mean  $2.1 \pm 0.2 \cdot 10^{11} \text{ spz mL}^{-1}$ ) was significantly higher ( $P < 0.001$ ,  $\alpha = 0.05$ ,  
statistical power = 1.0) than the later weeks (9, 10 and 11) ( $2.3 \pm 0.8 \cdot 10^{10} \text{ spz mL}^{-1}$ ). Mean  
326 duration of sperm motility was  $89 \pm 14$  seconds during the 6 weeks that sperm was  
collected. Significant differences were found in duration of sperm motility between week  
328 6 ( $154 \pm 38 \text{ s}$ ) and weeks 7, 8 and 10 (mean  $67 \pm 4 \text{ s}$ ). One male that was humanly  
sacrificed on week 10 had a GSI of 1.81 and histology showed the testes were full of  
330 spermatozoa.

Assessment by CASA of the 10 samples collected from all four males with high motility  
332 score and  $\geq 100 \mu\text{L}$  volume showed a mean motility percentage of  $74 \pm 0.01 \%$ , VCL of  
 $90.7 \pm 3.3 \mu\text{m s}^{-1}$ , VAP of  $84.6 \pm 5.5 \mu\text{m s}^{-1}$ , VSL of  $83.4 \pm 6.9 \mu\text{m s}^{-1}$ , LIN of  $91 \pm 0.5$   
334 %, WOB of  $93.5 \pm 0.1 \%$  and STR of  $97.9 \pm 0.7 \%$ .

### 3.3.3. *In vitro* fertilisation.

336 The 0.5 mL aliquots of stripped eggs ( $1224 \pm 150$  eggs) were fertilised by mixing with  
60  $\mu\text{L}$  (20  $\mu\text{L}/\text{male}$ ) of pooled diluted stripped sperm (sperm 1:4 in Marine Freeze®) ( $3.8$   
338  $\pm 0.8 \cdot 10^9 \text{ spz mL}^{-1}$ ). The mean sperm to egg ratio at fertilisation was  $189,521 \pm 23,541$

Ramos-Júdez, *et al.*,

spermatozoa egg<sup>-1</sup>. After an incubation period of 22 - 23 hours (24°C), mean embryo survival rate was  $0.4 \pm 0.2$  % (n = 3 females). At this age, the head region had formed and dark pigments covered almost all of the embryo and the oil globule (Fig 9A). Although, a single oil yolk globule was noticed in the majority of embryos, 28 % of the examined eggs presented multiple oil droplets. Mean fertilised egg diameter was  $844 \pm 4$  µm. Hatching rate, observed at 39 - 40 hours after fertilisation, was  $70.8 \pm 20$  % (Fig. 9B). Survival rate of larvae decreased to  $38.6 \pm 22$  % at 1 day post-hatching (dph). *M. cephalus* larvae at 1 dph had developing eye lens and a reduced yolk sac diameter (Fig 9C). Survival rate of larvae decreased to  $4.1 \pm 1.4$  % after 2 and remained the same to 3 dph. At 2 dph the yolk and oil globule were still present, but mouth parts were completely formed with upper and lower jaws opened (Fig 9D). In the last revision, corresponding to 4 dph the survival rate was zero.

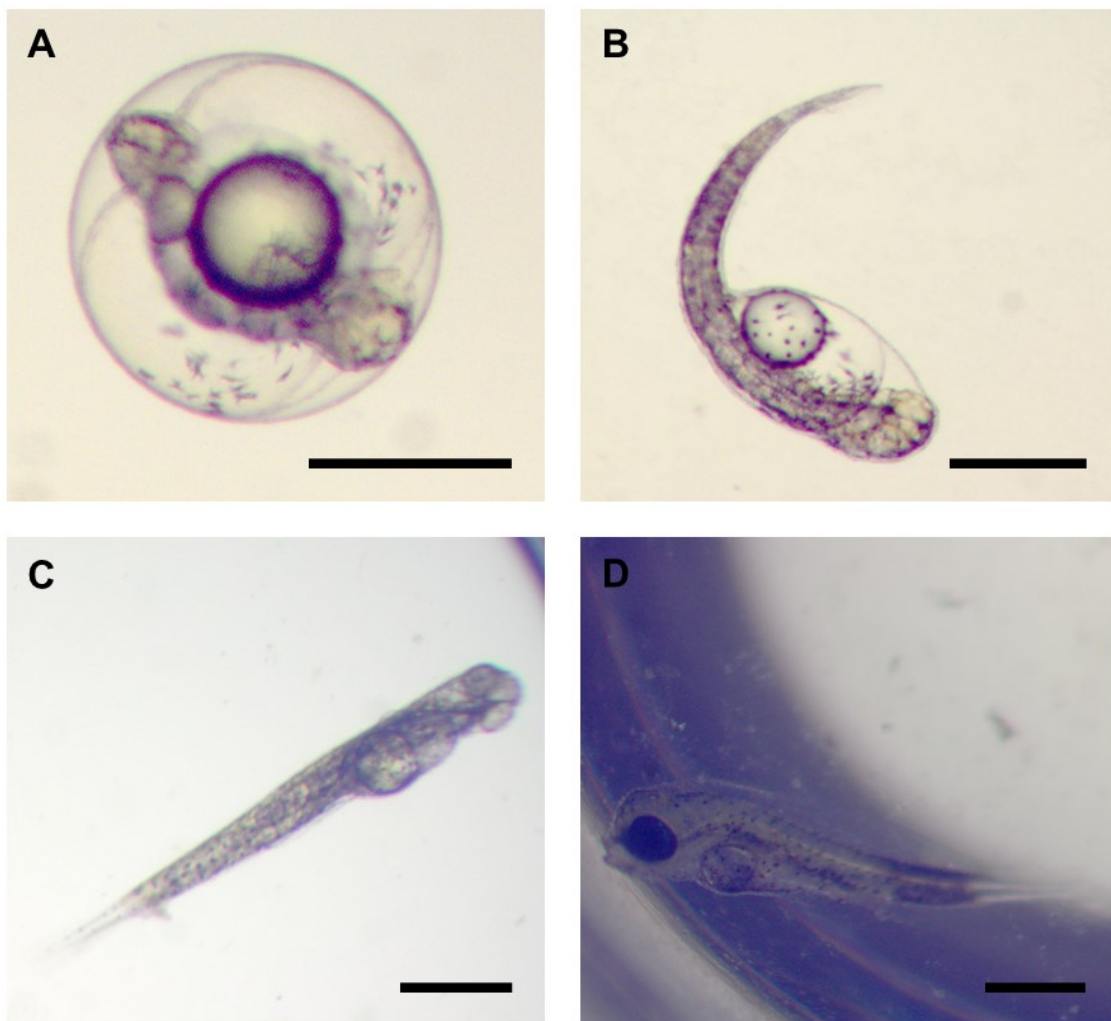

352 **Figure 9. Developing *Mugil cephalus* embryos and larvae from Experiment 2.** (A) Embryo at age 22  
354 h post-fertilisation with head region formed and dark pigments covering almost all the embryo and on the  
oil globule. (B) Hatching at age of 40 hours post-fertilisation. (C) Larva after 1 dph. A decrease in yolk sac  
356 was observed and the eye lens formed. (D) Larva after 2 dph with well-developed eye, with mouth parts  
formed and opened. Oil globule was still present. Scale bar: 500 µm.

Ramos-Júdez, *et al.*,

#### 358 4. Discussion

360 The present study shows that rFsh drives gametogenesis from early to late gonad  
developmental stages in both female and male mullet, and that rLh was influential to  
362 achieve oocyte maturation and gamete release (ovulation and spermiation). These  
findings are significant to both demonstrate the accepted roles of the Gths in teleost  
364 reproductive development and to provide tools for the control of reproduction in teleost  
species that experience reproductive dysfunctions early in the maturation process.

Flathead grey mullet is a species that exhibits severe reproductive dysfunctions in  
366 captivity that threatens the sustainability of mullet culture making it mostly dependant on  
wild captures. In the present study, all control fish remained arrested and gametogenesis  
368 did not progress although it was timed to coincide with the natural reproductive period.  
No control females developed further than primary growth or cortical alveoli stage and  
370 no control males produced sperm during the experimental periods. All of the control fish  
had sufficient size, 35 - 49 cm for females and 32 - 42 cm SL for males, and condition to  
372 mature according to reported sizes of maturity; 27 - 35 cm standard length for females  
and 25 - 30 cm for males [55]. The present study, encountered a more severe reproductive  
374 dysfunction than has been observed in other studies [15]. The severity of the reproductive  
dysfunction, highlights that in the present study, the application of rGths was critical in  
376 stimulating reproductive development in the experimental fish.

The hormone therapy to control the entire process of gametogenesis was initiated with  
378 the application of rFsh. The administration of different doses of rFsh to examine the  
biological activity, obtained a significant and prolonged (3 - 6 days) increases of E<sub>2</sub> after  
380 doses of 12 - 15 µg kg<sup>-1</sup>. The increase in plasma E<sub>2</sub> levels reflected the gonadotropic  
stimulation of the ovary by rFsh produced in the CHO system. The potent activity was  
382 further confirmed by the significant increase in E<sub>2</sub> plasma levels in relation to the weekly  
administration of rFsh (15 µg kg<sup>-1</sup> in Exp 1 and increasing doses 6, 9 and 12 µg kg<sup>-1</sup> in  
384 Exp 2) to female grey mullets. The plasma levels of E<sub>2</sub> at week 4 after rFsh application  
were 272 ± 43 pg mL<sup>-1</sup> in Exp 1 and 458.7 ± 113 pg mL<sup>-1</sup> in Exp 2. It should be noted  
386 that in both experiments, plasma E<sub>2</sub> was measured seven days after the application of rFsh  
as blood sampling was immediately before the weekly rFsh injection. The plasma levels  
388 seven days after rFsh application were similar to the natural E<sub>2</sub> peak of 312 ± 12 pg mL<sup>-1</sup>  
in *M. cephalus* [56], while other studies applying rFsh induced plasma levels of ~ 200  
390 pg mL<sup>-1</sup> 24 h after injection in rainbow trout (*Oncorhynchus mykiss*) [33] and ~ 4000 pg  
mL<sup>-1</sup> in goldfish (*Carassius auratus*) [35]. In the present study, the rFsh-mediated  
392 increase of E<sub>2</sub> plasma levels in females appeared to stimulate oocyte growth by the  
accumulation of lipid globules and yolk droplets, as E<sub>2</sub> stimulates vitellogenin synthesis  
394 by the liver [19]. The fact that the rFsh doses including lower rFsh doses in Exp 2 were  
sufficient to induce vitellogenesis may indicate that rFsh doses could be refined for future  
396 inductions.

In both experiments, oocytes grew from immature perinucleolar stage and/or cortical  
398 alveoli stage to vitellogenic stages after 4 - 5 weeks of rFsh administration. However, the  
response exhibited some variation from a few more advanced females to two females (one  
400 in each experiment) that did not reach vitellogenic stages in the 4 - 5 week-period. The  
delay in response of one female from Exp 1 could be attributed to the initial earlier stage  
402 of development (primary growth in the multiple nucleoli) at the beginning of the  
treatment. However, the other female did not initiate from an earlier stage of  
404 development, making it unclear if the variation in response was related to initial stage of  
development or a natural variation in the response to rFsh. The biological activity of rFsh

Ramos-Júdez, *et al.*,

406 applied to females of other fish species has been previously studied, but most studies have  
407 focused on *in vitro* approaches for receptor-binding capacity [39] and steroidogenic  
408 potency [23, 27, 31] or *in vivo* short-term effects [24, 33 - 35, 40] rather than *in vivo* long-  
409 term effects on gonadal development. When rFsh produced in other heterologous systems  
410 than CHO cells were tested in long-term treatments in different fish species, more time,  
411 dose and/or number of administrations were required to reach a less advanced stage of  
412 ovary development than in the present study. For instance, after 60 days of treatment with  
413 injections at 10-day intervals of rFsh produced in *P. pastoris* (10 - 20  $\mu\text{g kg}^{-1}$ ) immature  
414 yellowtail kingfish oocytes developed to cortical alveoli stage [29]. Weekly injections for  
415 8 weeks at 100  $\mu\text{g kg}^{-1}$  to juvenile grouper (*Epinephelus fuscoguttatus*) also induced  
416 development to the cortical alveoli stage [30]. Recombinant Fsh produced in *Drosophila*  
417 S2 cell line (100  $\mu\text{g kg}^{-1}$ ) induced early vitellogenesis in the Japanese eel after 56 days of  
418 treatment with a weekly administration [24] and rFsh (500  $\mu\text{g/kg}$ ) produced in HEK293  
419 cells induced initial oil droplet stage in previtellogenic yellow shortfinned eels (*Anguilla*  
420 *australis*) after three weeks [57]. These comparisons between the present study and other  
421 studies suggest a higher potency of rFsh produced in mammalian cell lines as previously  
422 reported in some species [40, 49].

The present study also provides evidence that Fsh is the major hormone to initiate  
423 vitellogenesis in teleosts. To date, no study has demonstrated that the exogenous  
424 application of just Fsh promotes the initiation of vitellogenesis and development through  
425 to late vitellogenic stages and that development progressed correctly to provide oocytes  
426 for the formation of viable eggs and larvae. The central role of Fsh in fish vitellogenesis  
427 is accepted [14, 19] based on parallels drawn with other taxa, correlations across many  
428 fish species between plasma Fsh and oocyte development, genomic approaches such as  
429 gene knockout to define Gths pathways [58] and evidence that rFsh induced partial  
430 development of vitellogenesis [26, 59, 60]. However, some criticisms can be made as,  
431 many differences in the control in reproduction exist between taxa, correlations do not  
432 necessarily indicate cause - effect and vitellogenesis although delayed proceeded when  
433 the Fshb gene was knocked out to make Fsh-deficient zebrafish (*Danio rerio*) [58].  
434 Therefore, the present study has added clear evidence to demonstrate the accepted  
435 function of Fsh by reporting for the first time in a teleost species that rFsh successfully  
436 induced the entire process of vitellogenesis from previtellogenic stages to late stages from  
437 which fertilised eggs and larvae were obtained.

Nevertheless, the administration of only rFsh in Exp 1 failed to complete oocyte growth  
440 as although oocytes developed until late secondary growth, the cells appeared to be  
441 arrested in this stage and subsequently, a substantial number of apoptotic cells were found  
442 in the later weeks (weeks 9 - 11). These results agree with previously described E<sub>2</sub> roles  
443 that did not include OM [19], but differ from those obtained by Das *et al.* [61] who  
444 induced OM in *M. cephalus* post-vitellogenic oocytes that were incubated *in vitro* with  
445 E<sub>2</sub>. The fact that OM could not be achieved using only rFsh suggested that, as previously  
446 described, OM and ovulation are Lh-dependent [19, 62]. According to Nagahama and  
447 Yamashita [62], secretion of Lh from the pituitary coincides with a switch in the gonad  
448 steroidogenic pathway from the production of predominantly E<sub>2</sub> during vitellogenesis to  
449 the production of progestin-like steroids, the maturation-inducing steroids (MIS). The  
450 MIS bind to oocyte membrane-specific receptors to activate the maturation promoting  
451 factor (MPF) that induces germinal vesicle breakdown and OM [19]. Therefore, in Stage  
452 2 of Exp 1 and Exp 2, we focused on the use of exogenous sources of Lh receptor agonists  
453 or hormones that may trigger the release of Lh from mullet pituitary with the aim to  
454 complete oocyte growth and induce OM.

Ramos-Júdez, *et al.*,

In Experiment 1, none of the hormone therapies, GnRHa with MET, hCG alone or in combination with progesterone induced the completion of vitellogenesis or maturation. Despite of the hormone treatments, the arrested oocyte diameter and morphology indicated that vitellogenic growth was not completed and the oocyte did not enter maturation. Oocyte diameter was arrested at  $425 \pm 19 \mu\text{m}$ , compared to  $>550 \mu\text{m}$  that appears to indicate complete vitellogenic growth and below which OM was not observed [50, 63, present study). The GnRHa with MET protocol used, was that described by Aizen *et al.* [15] for grey mullet, where GnRHa acts on the pituitary to stimulate the production and secretion of endogenous gonadotropins, which in turn induces steroidogenesis in the gonad, while MET removes the dopaminergic inhibition. However, in the present study, although there was a significant increase in oocyte diameter, the increase was not sufficient and there was no progress to OM, thus, the pituitary appeared not to respond. One explanation would be that the pituitary Lh content was low and insufficient for the induction of maturation. In carp species, when pituitary Lh content was low at the end of the spawning season, hormone therapies that induced the release of endogenous Lh were observed to be less effective [22]. The Lh receptor agonist, hCG, is widely used and has been employed to induce spawning in many cultured species [14, 64] including grey mullet with a dose range from 1000 to 30,000 IU kg<sup>-1</sup> [7, 9, 65]. The advantage of hCG is that it generally binds to the same receptors as Lh in the gonad to stimulate steroidogenesis and thus, does not dependent on the release of endogenous pituitary Lh [14]. The ineffectiveness of hCG in the present study may be related to a number of aspects. The mean higher oocyte diameter of the individuals that received the hCG injections did not reach the recommended size of previous studies for maturation induction ( $>500 \mu\text{m}$ ) in *M. cephalus* [7, 8, 15] and, possibly, the oocytes and follicles were not receptive at the time of hCG application. Another consideration is that hCG did not stimulate the switch in gonad steroidogenic pathway to MIS, as high E<sub>2</sub> levels were still produced in the late vitellogenic stage even with the application of progesterone, a precursor for MIS production [66]. The administration of rFsh may have complicated the switch as agonists of the Lh receptor also stimulated the Fsh receptor [39, 47] and high levels of rFsh may have affected this action of hCG. However, although the action of co-administration of hCG and rFsh can be questioned, when rFsh administration was ceased, females entered into regression.

In contrast, in Experiment 2, the co-administration of rLh with rFsh at advanced stages of vitellogenesis induced the completion of oocyte growth (mean  $609 \pm 5 \mu\text{m}$ ). Experiment 2 compared to Exp 1, appeared to show that the addition of rLh was required to increase maximum oocyte diameter to a diameter ( $>550 \mu\text{m}$ ) that represents the completion of oocyte growth and a diameter from which OM has been observed to progress [50, 63, present study]. In comparison, in Exp 1 when rFsh alone or in combination with hCG was administered oocyte development was arrested in late vitellogenesis and did not reach diameters that indicate the completion of vitellogenic growth. These observations, indicate that the completion of vitellogenic growth was dependent on Lh, which has not been previously described. It should also be highlighted that in Exp 2 vitellogenic growth was completed both with and without the application of rFsh. The dosage and the time interval of rLh treatment applied to induce OM were based on previous studies [42]. However, since the half-life of rLh in plasma has not been determined in grey mullet, the most efficient hormone treatment (dose and timing) remains to be established. In relation to the induction of OM and ovulation, the rationale behind the treatment of rLh plus progesterone, a precursor of maturation-inducing steroids, was to induce the Lh-mediated up-regulation of genes associated with these processes and to avoid potential substrate-limiting factors for MIS synthesis. In Exp 2,

Ramos-Júdez, *et al.*,

only fish receiving the highest rLh dose ( $30 \mu\text{g kg}^{-1}$ ) proceeded to OM and ovulation. This demonstrated that rLh dosage has a relevant effect and high doses were required. Recombinant Lh has been previously successfully used to induce OM and ovulation in bitterling (*Rhodeus ocellatus ocellatus*) [35], common carp (*Cyprinus carpio*) [67] and Malaysia catfish (*Hemibagrus nemurus*) [68]. However, the present study cannot confirm if a unique injection of rLh could have completed OM and ovulation without the need of progesterone application. The competence to undergo OM and, subsequently, ovulation required rLh, however, it appeared that there were additional requirements such as other hormones or a specific controlled interaction amongst rLh, rFsh and Gth receptors. The mean fecundity recorded in the present study was  $742,900 \pm 71,840 \text{ eggs kg}^{-1} \text{ bw}$  ( $\sim 855,800 \text{ eggs female}^{-1}$ ), which was within the range previously reported for *M. cephalus*, from 500,000 to 3,000,000 eggs female<sup>-1</sup>, that shows variation in relation to fish size and the technical procedures employed for egg collection [3].

Regarding males, the rGths induced spermatogenesis and spermiation in immature specimens in intensive captivity to provide milt for fertilisation procedures. The biological effects of rGths were evaluated through plasma 11-KT levels and by the presence of milt after abdominal pressure. The rFsh treatment in Exp 1 and rFsh with rLh in Exp 2, both increased the levels of 11-KT, which is the major androgen responsible for testicular development and increased plasma levels reflect the onset of gametogenesis [14, 15, 47, 69]. Moreover, males in control groups did not spermiate and spermiating males were only obtained with rGth treatment. Other studies induced spermatogenesis and spermiogenesis with long-term rGth administration. For example, in immature Japanese [36, 44, 70] and European eel [43] and in mature Senegalese sole [42, 45]. The administration of rFsh alone induced the production of low milt volumes, whilst the additional administration of rLH increased milt volumes and decreased spermatozoa concentration probably due to a stimulation of the production of seminal fluid. The induction of spermiation by rFsh alone has also been demonstrated in the European eel [43] and similarly the addition of rLh increased volumes and decreased spermatozoa concentration. However, the little seminal fluid produced in both experiments could explain the higher sperm concentrations observed (in the range of  $10^{10}$  and  $10^{11} \text{ spz mL}^{-1}$ ) with respect to that previously reported for this species ( $10^8$ ) [71]. Nevertheless, the rGth treatments provided spermiating males and, thus, sperm for fertilisation procedures even though the number of males in the study was low. The present study also indicated that there was a gender specific contrast in the action of rFsh alone as males completed a reduced production of spz compared to females that were arrested in late vitellogenesis and did not complete vitellogenic growth.

After hand stripping gametes and *in vitro* fertilisation, 0.4% of eggs developed embryos. The low percentage of eggs developing an embryo may be related to *in vitro* fertilisation procedures. The morphological aspect of the eggs appeared normal with the exception that 28% of the eggs had multiple oil droplets. In grey mullet, the manual pressure of artificial stripping increased the frequency of multiple oil droplets [11] and multiple oil droplets were related with low egg survival [72]. Another aspect related to bad egg quality and *in vitro* fertilisation procedures is overripening [73]. After ovulation, there is a period of egg ripeness with optimal viability after which the eggs overripen, losing quality and viability. This period of optimal egg quality for stripping varies among species, with temperature, between different stocks, holding conditions, hormone induction treatments and ideally should be defined for each situation [73]. For example, latency to obtain good quality eggs can be as long as 5 - 15 days over a temperature range of 10 - 17 °C for rainbow trout (*Oncorhynchus mykiss*) [74], 3 hours in meagre (*Argyrosomus regius*) at

Ramos-Júdez, *et al.*,

554 18 °C [73] but only 30 min in white bass (*Morone chrysops*) at 22 °C [75]. For the present  
555 treatment in *M. cephalus*, the timing of ovulation and optimal egg quality has not been  
556 previously defined. However, latency times have been reported for grey mullet using the  
557 hormone treatments, carp pituitary extracts with hCG or GnRHa [9], hCG [76] and  
558 pituitary glands combined with synahorin and vitamin E [77] and times ranged from 30  
559 to 48 hours after the initial priming dose and 12 to 26 h after the resolving dose. In the  
560 present study, eggs were stripped at 40 h and  $48 \pm 0.5$  h from rLh administration (16 h  
561 and 24 h from progesterone). The female stripped at 40 h was induced to ovulate with  
562 PG-F2 $\alpha$  and the stripped eggs had vitellogenin and oil in the process of coalescing  
563 apparently not having completed maturation and hydration when the oocytes were  
564 ovulated. On the contrary, at  $48 \pm 0.5$  h after the rLh injection, low fertilisation rates were  
565 obtained. This was at the limit of the period of good egg quality that has been found with  
566 other hormone treatments (30 to 48 hours), which may indicate that the 48-h stripping  
567 time was late and that the eggs were undergoing overripening. Determining the timing of  
568 ovulation and the window of good egg quality are crucial to obtain high fertilisation rates  
569 and, therefore, further studies are required to determine the quality of eggs that can be  
570 achieved with rGth based therapies.

Fertilised grey mullet egg diameter has been reported to vary from 0.65 - 1.08 mm  
571 differing with different geographical areas [3]. In the present study, the fertilised eggs  
572 ranged in diameter from 0.82 to 0.88 mm at a temperature of 24°C and salinity of 36 ‰.  
573 Hatching was 39 - 40 hours after fertilisation at 24 °C, which is in agreement with  
574 previous reports of hatching time: 34 - 38 h at 22 - 24.5 °C and 49 - 54 h at 22.5 - 23.7 °C  
575 [3]. High mortalities were found at two and three days post hatching (dph), which  
576 coincides with the period that mouth, upper and lower jaws opened although the yolk sac  
577 was still present. These high mortalities were probably due to starvation as no food was  
578 offered and survival depends on the availability of external food organisms to larvae on  
579 the second-day, 36 hours post-hatch, before the completion of yolk sac absorption [6].

In conclusion, the present study reports that treatment with rGths is able to induce full  
581 gametogenesis and the production of viable eggs and larvae in a teleost. The control of  
582 the entire reproductive process using rGths, and particularly the initiation of  
583 vitellogenesis and development through to late stages with rFsh, offer further  
584 confirmation of the central roles of the Gths in teleost gametogenesis. A refined protocol  
585 based on the present study could provide full reproductive control of flathead grey mullet  
586 held in intensive aquaculture facilities. In addition, these findings raise the possibility of  
587 using the rGth treatments for species that present similar reproductive disorders in  
588 aquaculture, the aquarium industry and for the conservation of endangered species.

## 590 Acknowledgments

The authors would like to thank Josep Lluís Celades and the IRTA staff for technical help.  
591 Special thanks to Narciso Mazuelos from Finca Veta La Palma (Isla Mayor, Sevilla) for  
592 providing us with mullet broodstock and Ana Gómez for providing antibody against  
593 European seabass (*D. labrax*) glycoprotein  $\alpha$  subunit raised in rabbit. This study has been  
594 supported with funding from the European Union's Seventh Framework Programme for  
595 research, technological development and demonstration (GA 603121, DIVERSIFY to  
596 H.R. and N.D.), the Spanish National Institute for Agronomic Research (Instituto  
597 Nacional de Investigación y Tecnología Agraria y Alimentación - INIA)-European Fund  
598 for Economic and Regional Development (FEDER) (RTA2014-0048 to N.D.), the  
599 Spanish Ministry of Science and Innovation (Ministerio de Asuntos Economicos y  
600

Ramos-Júdez, *et al.*,

602 Transformación Digital - MINECO) (RTI2018-094710-R-I00 to N.D.) and Rara Avis  
Biotec S. L. (I.G., Valencia, Spain). Participation of S.R. and W.G. was funded,  
604 respectively, by a PhD grant from AGAUR (Government of Catalonia) co-financed by  
the European Social Fund and a PhD grant from the National Board of Science and  
Technology (CONACYT, Mexico).

## 606 5. References

- 608 1. McDonough C, Roumillat WA, Wenner CA. Sexual differentiation and gonad  
development in striped mullet (*Mugil cephalus* L.) from South Carolina estuaries.  
Fishery Bulletin. 2005; 103: 601-619.
- 610 2. FAO 2019. The State of World Fisheries and Aquaculture. (SOFIA). Rome: Food and  
Agriculture Organization of the United Nations, 1-230.
- 612 3. González-Castro M, Minos G. Sexuality and Reproduction of Mugilidae. In: Crosetti  
D, Blaber SJM, editors. Biology, Ecology and Culture of Grey Mulletts. Boca Raton,  
614 FL: CRC Press; 2016. pp. 227-263.
- 616 4. Yousif OM, Fatah AA., Krishna K, Minh DV, Hung BV. Induced spawning and  
larviculture of grey mullet, *Mugil cephalus* (Linnaeus 1758) in the Emirate of Abu  
Dhabi. Aquaculture Asia. 2010; 15(1): 1-3.
- 618 5. Khemis IB, Hamza N, Sadok S. Nutritional quality of the fresh and processed grey  
mullet (Mugilidae) products: a short review including data concerning fish from  
620 freshwater, Aquat Living Resour. 2019; 32 (2).
- 622 6. Abraham M, Shiranee P, Kishore Chandra P, Kailasam M, Charles V K. Embryonic  
and larval development of the striped mullet *Mugil cephalus* (L). Indian Journal of  
Fisheries. 1999; 2: 123 -131.
- 624 7. El-Gharabawy MM, Assem SS. Spawning induction in the Mediterranean grey mullet  
*Mugil cephalus* and larval developmental stages. African Journal of Biotechnology.  
626 2006; 5: 1836-1845.
- 628 8. Vazirzadeh A, Ezhdehakhoshpour A. The effects of different hormonal treatments on  
the oocyte maturation in wild grey mullet (*Mugil cephalus*) collected from the Iranian  
coastal waters of the Oman Sea. Iranian journal of Ichthyology. 2014; 1.
- 630 9. Karim E, Hasan J, Hoq E. Hormone induced artificial breeding of a commercially  
important marine finfish, striped mullet (*Mugil cephalus* L.) in Bangladesh. Turkish  
632 Journal of Fisheries and Aquatic Sciences. 2016; 16: 135-140.
- 634 10. Das NG, Hossain MS, Bhattacharjee S, Barua P. Comparative study for broodstock  
management of grey mullet (*Mugil cephalus* L.) in cages and earthen ponds with  
hormone treatment. Aquaculture Asia, 2008; 30-33.
- 636 11. Kuo C, Shehadeh ZH, Milken KK. A preliminary report on the development, growth  
and survival of laboratory reared larvae of the grey mullet, *Mugil cephalus* L. Journal  
638 of fish biology. 1973; 5 (4): 459-470.
- 640 12. El-Greisy ZA, Shaheen AA. Comparative difference between the effects of Lhrh-a,  
17 A-Methyltestosterone pellets and HCG on reproductive performance of *Mugil*  
*cephalus*. J. Applied Science Research. 2007; 3(9): 890-895.
- 642 13. Zohar Y, Mylonas CC. Endocrine manipulations of spawning in cultured fish: from  
hormones to genes. Aquaculture. 2001; 197: 99-1.
- 644 14. Mañanós E, Duncan N, Mylonas CC. Reproduction and control of ovulation,  
spermiation and spawning in cultured fish. In: Cabrita E, Robles V, Herráez MP,  
646 editors. Methods in Reproductive Aquaculture: Marine and Freshwater species.  
Taylor and Francis Group LLC, CRC Press; 2009. pp. 3-80.



Ramos-Júdez, *et al.*,

- 648 15. Aizen J, Meiri I, Tzchori I, Levavi-Sivan B, Rosenfeld H. Enhancing spawning in the  
650 grey mullet (*Mugil cephalus*) by removal of dopaminergic inhibition. *General and*  
*Comparative Endocrinology*. 2005; 142: 212-221.
- 652 16. Yashouv A. Preliminary report on induced spawning of *M. cephalus* (L.) reared in  
654 captivity in freshwater ponds. *Bamidgeh*. 1969; 21(1): 19-24.
- 656 17. De Monbrison DD, Tzchori I, Holland MC, Zohar Y, Yaron Z, Elizur A. Acceleration  
658 of gonadal development and spawning induction in the Mediterranean grey mullet,  
*(Mugil cephalus)*: Preliminary studies. *Bamidjeh*. 1997; 49(4): 214-221.
- 660 18. Shehadeh ZH, Kuo CM, Milisen KK. Induced spawning of grey mullet (*Mugil*  
662 *cephalus* L.) with fractional salmon pituitary extract. *J Fish Biol*. 1973; 5: 471-478.
- 664 19. Lubzens E, Young G, Bobe J, Cerdà J. Oogenesis in teleosts: How fish eggs are  
666 formed. *Gen Comp Endocrinol*. 2010; 165: 367-89.
- 668 20. Glubokov, AI, Kouril J, Mikodina EV, Barth T. Effects of synthetic GnRH analogues  
670 and dopamine antagonists on the maturation of Pacific mullet, *Mugil so-iuy* Bas.  
*Aquacult Fish Manage*. 1994; 25: 419-425.
- 672 21. Meiri-Ashkenazi I, Bracha C, Zlatnikov V, Rosenfeld H. Overcoming reproductive  
674 dysfunctions in captive grey mullet (*Mugil cephalus*): an expanded tool box for  
676 successful breeding. 11<sup>th</sup> International Symposium of Reproductive Physiology of  
678 fish. 2018; 133.
- 680 22. Yaron Z, Bogomolnaya A, Drori S, Biton I, Aizen J, Kulikovsky Z, et al. Spawning  
682 Induction in the Carp: Past Experience and Future Prospects - A Review. *Israeli*  
*Journal of Aquaculture - Bamidgeh*. 2009; 61: 5-26.
- 684 23. Zmora N, Kazeto Y, Kumar RS, Schulz RW, Trant J. Production of recombinant  
686 channel catfish (*Ictalurus punctatus*) FSH and LH in S2 Drosophila cell line and an  
688 indication of their different actions. *J Endocrinol*. 2007; 194: 407-16.
- 690 24. Kazeto Y, Kohara M, Miura T, Miura C, Yamaguchi S, Trant J. M. Japanese Eel  
692 Follicle-Stimulating Hormone (Fsh) and Luteinizing Hormone (Lh): production of  
694 biologically active recombinant Fsh and Lh by Drosophila S2 cells and their  
696 differential actions on the reproductive biology. *Biol Reprod*. 2008; 79: 938-946.
- 698 25. Kamei H, Ohira T, Yoshiura Y, Uchida N, Nagasawa H, Aida K. Expression of a  
700 biologically active recombinant follicle stimulating hormone of Japanese Eel *Anguilla*  
*japonica* using methylotropic yeast, *Pichia pastoris*. *Gen Comp Endocrinol*. 2003;  
702 134(3): 244-54.
- 704 26. Aizen J, Kasuto H, Golan M, Zakay H, Levavi-Sivan B. Tilapia Follicle-Stimulating  
706 Hormone (FSH): Immunochemistry, Stimulation by Gonadotropin-Releasing  
708 Hormone, and Effect of Biologically Active Recombinant FSH on Steroid Secretion.  
710 *Biol Reprod*. 2007; 76: 692-700.
- 712 27. Kasuto H, Levavi-Sivan B. Production of biologically active tethered tilapia LH  
714 betaalpha by the methylotrophic yeast *Pichia pastoris*. *Gen Comp Endocrinol*. 2005;  
716 140(3): 222-32.
- 718 28. Chen J, Zhang Y, Tang Z, Mao J, Kuang Z, Qin C, et al. Production of recombinant  
720 orange-spotted grouper (*Epinephelus coioides*) follicle-stimulating hormone (FSH) in  
722 single-chain form and dimer form by *Pichia pastoris* and their biological activities.  
724 *Gen Comp Endocrinol*. 2012; 178: 237-249.
- 726 29. Sanchís-Benlloch PJ, Nocillado J, Ladisa C, Aizen J, Miller A, Shpilman M, et al. *In-*  
728 *vitro* and *in-vivo* biological activity of recombinant yellowtail kingfish (*Seriola*  
*lalandi*) follicle stimulating hormone. *Gen Comp Endocrinol*. 2017; 241: 41-49.
- 730 30. Palma P, Nocillado J, Superio J, Ayson EGJ, Ayson F, Bar I, et al. Gonadal response  
732 of juvenile protogynous grouper (*Epinephelus fuscoguttatus*) to long-term

Ramos-Júdez, *et al.*,

- 698 recombinant follicle-stimulating hormone administration. *Biol Reprod.* 2019; 100 (3):  
700 798-809.
31. Meri I, Zmora N, Elizur A. Functional expression of recombinant seabream FSH and  
702 LH in baculovirus infected insect cells. Sixth international symposium on the  
704 reproductive physiology of fish. 2000.
32. Cui M, Li W, Liu W, Yang K, Pang Y, Haoran L. Production of recombinant orange-  
706 spotted grouper (*Epinephelus coioides*) luteinizing hormone in insect cells by the  
708 baculovirus expression system and its biological effect. *Biol Reprod.* 2007; 76(1):74-  
710 84.
33. Ko H, Park W, Kim D, Kobayashi M, Sohn YC. Biological activities of recombinant  
712 Manchurian trout FSH and LH: their receptor specificity, steroidogenic and  
714 vitellogenic potencies. *J Mol Endocrinol.* 2007; 38: 99-111.
34. Kobayashi M, Morita T, Ikeguchi K, Yoshizaki G, Suzuki T, Watabe S. Production  
716 of recombinant goldfish gonadotropins by baculovirus in silkworm larvae. *Fish  
718 Physiology and Biochemistry.* 2003; 28: 469-471.
35. Kobayashi M, Morita T, Ikeguchi K, Yoshizaki G, Suzuki T, Watabe S. *In vivo*  
720 biological activity of recombinant goldfish gonadotropins produced by baculovirus in  
722 silkworm larvae. *Aquaculture.* 2006; 256: 433-442.
36. Kobayashi M, Hayakawa Y, Park W, Banba A, Yoshizaki G, Kumamaru K, et al.  
724 2010. Production of recombinant Japanese eel gonadotropins by baculovirus in  
726 silkworm larvae. *Gen Comp Endocrinol.* 2010; 167: 379-386.
37. Kazeto Y, Tanaka T, Suzuki H, Ozaki I, Fukada H, Gen K. Development and  
728 validation of enzyme-linked immunosorbent assays specific for follicle-stimulating  
730 hormone and luteinizing hormone in Japanese eel. *Fish Sci.* 2019; 85: 829-837.
38. Choi E, Ko H, Shin J, Kim M, Sohn YC. Expression of gonadotropin genes in  
732 Manchurian trout *Brachymystax lenok* and production of recombinant gonadotropins.  
734 *Fisheries Science.* 2005; 71(6): 1193-1200.
39. So WK, Kwok HF, Ge W. Zebrafish Gonadotropins and Their Receptors: II. Cloning  
736 and Characterization of Zebrafish Follicle-Stimulating Hormone and Luteinizing  
738 Hormone Subunits - Their Spatial-Temporal Expression Patterns and Receptor  
740 Specificity. *Biol Reprod.* 2005; 72(6):1382-1396.
40. Molés G, Zanuy S, Muñoz I, Crespo B, Martínez I, Mañanós E, et al. Receptor  
742 specificity and functional comparison of recombinant sea bass (*Dicentrarchus labrax*)  
744 gonadotropins (Fsh and Lh) produced in different host systems. *Biol Reprod.* 2011;  
746 84: 1171-1181.
41. Giménez I, de la Gandara F, Arizcun M, Baixauli P, Ortega A, García-Alcázar A.  
748 Inducción de la vitellogénesis mediante FSH y LH específicas de lubina. XV Congreso  
750 Nacional y I Congreso Ibérico de Acuicultura. 2015; 172-173.
42. Chauvigné F, Ollé J, González W, Duncan N, Giménez I, Cerdà J. Toward developing  
752 recombinant gonadotropin-based hormone therapies for increasing fertility in the  
754 flatfish Senegalese sole. *PLOS ONE.* 2017; 12(3): e0174387.  
756 <https://doi.org/10.1371/journal.pone.0174387>
43. Peñaranda DS, Gallego V, Rozenfeld C, Herranz-Jusado JG, Pérez L, Gómez A, et  
758 al. Using specific recombinant gonadotropins to induce spermatogenesis and  
760 spermiation in the European eel (*Anguilla anguilla*), *Theriogenology.* 2018; 107: 6-  
762 20.
44. Kamei H, Kaneko T, Aida K. *In vivo* gonadotropic effects of recombinant Japanese  
764 eel follicle-stimulating hormone. *Aquaculture.* 2006; 261: 771-775.

Ramos-Júdez, *et al.*,

- 746 45. Chauvigné F, González W, Ramos S, Ducat C, Duncan N, Giménez I, et al. Seasonal-  
748 and dose-dependent effects of recombinant gonadotropins on sperm production and  
750 quality in the flatfish *Solea senegalensis*. *Comparative Biochemistry and Physiology,*  
752 *Part A.* 2018; 225: 59-64.
- 750 46. Tamaru CS, Lee CS, Kelley CD, Miyamoto G, Moriwake A. Oocyte growth in the  
752 striped mullet *Mugil cephalus* L. maturing at different salinities. *Journal of the World*  
754 *Aquaculture Society.* 1994; 25(1): 109-115.
- 754 47. Chauvigné F, Verdura S, Mazón MJ, Duncan N, Zanuy S, Gómez A, et al. Follicle  
756 stimulating hormone and luteinizing hormone mediate the androgenic pathway in  
758 Leydig cells of an evolutionary advanced teleost. *Biol Reprod.* 2012; 87(2): 35.
- 756 48. Rao RK, Babu KR. 2016. Reproductive biology of the flathead grey mullet, *Mugil*  
758 *cephalus* (Linnaeus, 1758) from Krishna Estuarine Region, East Coast of Andhra  
760 Pradesh, India. *International Journal of Fisheries and Aquatic Studies.* 2016; 4(6):  
762 483-488.
- 760 49. Levavi-Sivan B, Bogerd J, Mañanós EL, Gómez A, Lareyre JJ. Perspectives on fish  
762 gonadotropins. *Gen Comp Endocrinol.* 2010; 165: 412-437.
- 762 50. Yousefian M, Ghanei M, Pourgolam R, Rostami H. Gonad development and  
764 hormonal induction in artificial propagation of grey mullet, *Mugil cephalus* L.  
766 *Research Journal of Fisheries and Hydrobiology.* 2009; 4: 35-40.
- 766 51. González-López WÁ, Ramos-Júdez S, Giménez I, Duncan NJ. Sperm contamination  
768 by urine in Senegalese sole (*Solea senegalensis*) and the use of extender solutions for  
770 short-term chilled storage. *Aquaculture.* 2020; 516: 734649.
- 768 52. Greeley MS, Calder DR, Wallace RA. Oocyte growth and developmet in the stripped  
770 mullet, *Mugil cephalus*, during seasonal ovarian recrudescence: Relationship to  
772 fecundity and size and maturity. *Fishery Bulletin.* 1987; 85 (2).
- 772 53. Cabrita E, Robles V, Herráez MP. Sperm quality assessment. In: Cabrita E, Robles  
774 V, Herráez MP, editors. *Methods in Reproductive Aquaculture: Marine and*  
776 *Freshwater species.* Taylor and Francis Group LLC, CRC Press; 2009. pp. 3-80.
- 774 54. Wilson-Leedy JG, Ingermann RL. Development of a novel CASA system based on  
776 open source software for characterization of zebrafish sperm motility parameters.  
778 *Theriogenology.* 2007; (3), 661-672.
- 778 55. Whitfield A, Panfili J, Durand J. A global review of the cosmopolitan flathead mullet  
780 *Mugil cephalus* Linnaeus 1758 (Teleostei: Mugilidae), with emphasis on the biology,  
782 genetics, ecology and fisheries aspects of this apparent species complex. *Reviews in*  
784 *Fish Biology and Fisheries.* 2012; 22.
- 782 56. Kumar P, Arasu ART, Kailasam M, Sukumarran K, Subburj R., Tyagraj G, et al.  
784 Gonadal development and steroid hormone profile of wild caught grey mullet (*Mugil*  
786 *cephalus*). *Biological Rhythm Research.* 2015; 46: 1-10.
- 784 57. Nguyen AT, Chia JHZ, Kazeto Y, Wylie MJ, Lokman PM. Induction of oocyte  
786 development in previtellogenic eel, *Anguilla australis*. *General and Comparative*  
788 *Endocrinology.* 2020; 291.
- 788 58. Zhang Z, Zhu B, Ge W. Genetic analysis of zebrafish gonadotropin (FSH and LH)  
790 functions by TALEN-mediated gene disruption. *Mol Endocrinol.* 2015; 29(1): 76-98.
- 790 59. Molés G, Gómez A, Carrillo M, Zanuy S. Development of a homologous enzyme-  
792 linked immunosorbent assay for European sea bass FSH. Reproductive cycle plasma  
794 levels in both sexes and in yearling precocious and non-precocious males. *Gen Comp*  
796 *Endocrinol.* 2012; 176 (1): 70-78.
- 794 60. Shimizu A, Ohkubo M, Hamaguchi M. Development of non-competitive enzyme-  
796 linked immunosorbent assays for mummichog *Fundulus heteloclitus* gonadotropins-

Ramos-Júdez, *et al.*,

- examining seasonal variations in plasma FSH and LH levels in both sexes. *Gen Comp Endocrinol.* 2012; 178: 463-9.
- 796 61. Das P, Pramarick H, Mukherjee D, Maiti BR. *In vitro* induction of oocyte maturation and steroidogenesis by gonadotropins, insulin, calcitonin and growth factor in an estuarine flat head grey mullet, *Mugil cephalus* L. *Fish Physiol Biochem.* 2014; 40: 798 105-106.
- 800 62. Nagahama Y, Yamashita M. Regulation of oocyte maturation in fish. *Development, Growth & Differentiation.* 2008; 50: 195-219.
- 802 63. Tamaru CS, Gerald WJF, and Sato V. Hatchery manual for the artificial propagation of striped mullet (*Mugil cephalus*). Department of Commerce, Suite 601, G.I.T.C 804 Bldg. 590 South Marine Drive, Tamuning, Guam- 96911. 1993; 167pp
- 806 64. Malison JA, Procarionem LS, Kayes TB, Hansen JF, Held JA. Induction of out-of-season spawning in walleye (*Stizosteidon vitreum*). *Aquaculture.* 1998; 163: 151-161.
- 808 65. Lee CS, Tamaru CS. Advances and future prospects of controlled maturation and spawning of grey mullet (*Mugil cephalus* L.) in captivity. *Aquaculture.* 1988; 74: 63- 810 73.
- 812 66. Tokarz J, Möller G, Hrabe de Angelis M, Adamski J. Steroids in teleost fishes: A functional point of view. *Steroids.* 2015; 103: 123-144.
- 814 67. Aizen J., Hollander-Cohen L, Shpilman M, Levavi-Sivan B. Biologically active recombinant carp LH as a spawning-inducing agent for carp. *J Endocrinol.*, 2017; 232(3): 391-402.
- 816 68. Salwany MY, Zulperi Z, Christianus A, Yusoff F. Recombinant luteinizing hormone development to improve the reproductive performance of female malaysia catfish, 818 *hemibagrus nemurus* (Valenciennes, 1840). *Turkish Journal of Fisheries and Aquatic Sciences.* 2019; 19: 689-697. 10.4194/1303-2712-v19\_8\_07.
- 820 69. Schulz RW, de França LR, Lareyre JJ, Le Gac F, Chiarini-Garcia H, Nobrega RH, Miura T. Spermatogenesis in fish. *Gen Comp Endocrinol.* 2010; 165: 390-411.
- 822 70. Hayakawa Y, Morita T, Kitamura W, Kanda S, Banba A, Nagaya H, et al. Biological activities of single-chain goldfish follicle-stimulating hormone and luteinizing 824 hormone. *Aquaculture.* 2008; 274: 408-415.
- 826 71. Ramachandran B, Natesan M. Assessment of sperm quality and short term preservation of sperm in grey mullet *Mugil cephalus* Linnaeus, 1758. *Indian Journal of Fisheries.* 2016; 63(4): 140-144.
- 828 72. Nash CE, Shehadeh ZH., editors. Review of breeding and propagation techniques for grey mullet, *Mugil cephalus* L. *ICLARM Stud. Rev.* 1980.
- 830 73. Ramos-Júdez S, González W, Dutto G, Mylonas CC., Fauvel C, Duncan N. Gamete quality and management for *in vitro* fertilisation in meagre (*Argyrosomus regius*). 832 *Aquaculture.* 2019; 509: 227-235.
- 834 74. Samarin AM, Ahmadi MR, Azuma T, Rafiee GR, Amiri BM, Naghavi MR. Influence of the time to egg stripping on eyeing and hatching rates in rainbow trout *Oncorhynchus mykiss* under cold temperatures. *Aquaculture.* 2008; 278: 195-198.
- 836 75. Mylonas CC, Magnus Y, Gissis, A., Klebanov, Y., Zohar, Y. Application of controlled-release, GnRHa-delivery systems in commercial production of white bass X striped 838 bass hybrids (sunshine bass), using captive broodstocks. *Aquaculture.* 1996; 140: 265-280.
- 840 76. Kuo C, Shehadeh ZH, Nash CE. Induced spawning of captive grey mullet (*Mugil cephalus* L.) females by injection of human chorionic gonadotropin (HCG). 842 *Aquaculture.* 1973; 1: 429-432.

Ramos-Júdez, *et al.*,

- 844 77. Liao IC. The experiments on the induced breeding of the grey mullet in Taiwan from 1963–1973. Paper presented at IBP/PM international Symposium on the Grey Mulletts and their Culture, Haifa, Israel. *Aquaculture*. 1975; 6(1): 31.
